# Supplementary material for: Proteomic signatures and machine learning based-prediction models for cardiovascular risk in survivors of myocardial infarction
Source: Research Square preprint supplement (doi:10.21203/rs.3.rs-8004311/v1), 2025-12-01
Supplement: Supplementary file 1 [file 16ac0fb22b788f4b08ef688f.xlsx]

## Sheet: Supplementary Data 1
Supplementary Data 1. Definition of the MI
Components	Codes
Myocardial infarction (MI)	UKB Field-ID 42000

## Sheet: Supplementary Data 2
Supplementary Data 2. Definition of the outcomes
Components	Codes
All-cause mortality	UKB Field-ID 40000
Heart Failure (HF)	ICD-10: I50
Ischemic Stroke (IS)	UKB Field-ID 42008

## Sheet: Supplementary Data 3
Supplementary Data 3. 570 significant proteins for all-cause mortality.
Variables	N	beta	se	P	HR(CI)
ACTA2	1351	0.516187	0.0524482	7.43414e-23	1.68 (1.51, 1.86)
ACVRL1	1365	0.62105	0.054417	3.60875e-30	1.86 (1.67, 2.07)
ADA2	1380	0.448457	0.0523025	9.9689e-18	1.57 (1.41, 1.73)
ADAM12	1133	0.605722	0.0621772	1.99841e-22	1.83 (1.62, 2.07)
ADAM23	1395	0.214182	0.0486227	1.05795e-05	1.24 (1.13, 1.36)
ADAM9	1157	0.445658	0.0580692	1.65932e-14	1.56 (1.39, 1.75)
ADAMTS1	1133	0.377888	0.0568423	2.97096e-11	1.46 (1.31, 1.63)
ADAMTS15	1370	0.330504	0.0554387	2.49753e-09	1.39 (1.25, 1.55)
ADAMTS4	1133	0.275252	0.0552621	6.33044e-07	1.32 (1.18, 1.47)
ADAMTSL2	1166	0.386965	0.0612532	2.65889e-10	1.47 (1.31, 1.66)
ADGRB3	1365	0.291698	0.0491388	2.91677e-09	1.34 (1.22, 1.47)
ADGRD1	1132	0.285537	0.0594646	1.57252e-06	1.33 (1.18, 1.49)
ADGRE2	1378	0.245516	0.0514983	1.86567e-06	1.28 (1.16, 1.41)
ADGRE5	1399	0.282184	0.052015	5.79398e-08	1.33 (1.2, 1.47)
ADGRG1	1370	0.364173	0.0555927	5.72523e-11	1.44 (1.29, 1.61)
ADM	1395	0.575256	0.0558523	7.07501e-25	1.78 (1.59, 1.98)
AGR2	1320	0.241402	0.0499579	1.35087e-06	1.27 (1.15, 1.4)
AGRN	1378	0.466723	0.0515994	1.4949e-19	1.59 (1.44, 1.76)
AGRP	1395	0.280175	0.0497384	1.77122e-08	1.32 (1.2, 1.46)
AHNAK	1120	0.320964	0.0580077	3.14553e-08	1.38 (1.23, 1.54)
ALCAM	1405	0.307619	0.0522447	3.90776e-09	1.36 (1.23, 1.51)
AMBP	1395	0.296375	0.0510729	6.51452e-09	1.34 (1.22, 1.49)
ANG	1387	0.287517	0.0494927	6.27435e-09	1.33 (1.21, 1.47)
ANGPT2	1395	0.549013	0.0541701	3.86421e-24	1.73 (1.56, 1.93)
ANGPTL4	1378	0.494827	0.0527699	6.78269e-21	1.64 (1.48, 1.82)
ANGPTL7	1395	0.262186	0.0497568	1.36911e-07	1.3 (1.18, 1.43)
AOC3	1394	0.324155	0.051017	2.09971e-10	1.38 (1.25, 1.53)
APOA2	1164	0.262821	0.0557844	2.46055e-06	1.3 (1.17, 1.45)
AREG	1370	0.501257	0.053282	5.0744e-21	1.65 (1.49, 1.83)
ASGR1	1368	0.387775	0.0523013	1.22312e-13	1.47 (1.33, 1.63)
ASGR2	1164	0.266684	0.0551075	1.30276e-06	1.31 (1.17, 1.45)
ATRAID	1157	0.42688	0.0577651	1.46914e-13	1.53 (1.37, 1.72)
B2M	1162	0.497439	0.0591011	3.87079e-17	1.64 (1.46, 1.85)
B3GNT7	1120	0.256932	0.0550093	3.00189e-06	1.29 (1.16, 1.44)
B4GALT1	1378	0.31062	0.0497076	4.13264e-10	1.36 (1.24, 1.5)
BAMBI	1355	0.358182	0.0495977	5.13257e-13	1.43 (1.3, 1.58)
BCAM	1384	0.273647	0.050025	4.495e-08	1.31 (1.19, 1.45)
BCHE	1144	-0.242567	0.0563746	1.68681e-05	0.78 (0.7, 0.88)
BCL2	1157	0.285942	0.0538011	1.06775e-07	1.33 (1.2, 1.48)
BCL2L11	1375	0.212483	0.0485239	1.19267e-05	1.24 (1.12, 1.36)
BGLAP	1166	0.269628	0.0564591	1.79152e-06	1.31 (1.17, 1.46)
BMPER	1132	0.439857	0.0617476	1.05244e-12	1.55 (1.38, 1.75)
BNIP3L	1133	0.253956	0.0569337	8.17456e-06	1.29 (1.15, 1.44)
BRK1	1337	0.223854	0.048579	4.06465e-06	1.25 (1.14, 1.38)
BSG	1393	0.404983	0.0498773	4.67756e-16	1.5 (1.36, 1.65)
BTN2A1	1378	0.384538	0.0502792	2.04036e-14	1.47 (1.33, 1.62)
BTN3A2	1375	0.402525	0.0512095	3.83003e-15	1.5 (1.35, 1.65)
C1QA	1388	0.299421	0.0506852	3.47435e-09	1.35 (1.22, 1.49)
C7	1138	0.528081	0.061436	8.28125e-18	1.7 (1.5, 1.91)
CA12	1370	0.262603	0.0508478	2.41105e-07	1.3 (1.18, 1.44)
CALB1	1370	0.297578	0.0511521	5.97297e-09	1.35 (1.22, 1.49)
CALB2	1337	0.325207	0.055135	3.6707e-09	1.38 (1.24, 1.54)
CALCB	1153	0.324704	0.0573645	1.51045e-08	1.38 (1.24, 1.55)
CANT1	1387	0.232878	0.0501528	3.42782e-06	1.26 (1.14, 1.39)
CAPG	1377	0.238309	0.049733	1.65316e-06	1.27 (1.15, 1.4)
CCDC80	1392	0.338301	0.0519392	7.34686e-11	1.4 (1.27, 1.55)
CCL14	1387	0.416848	0.0513188	4.55892e-16	1.52 (1.37, 1.68)
CCL15	1405	0.432881	0.0505823	1.14886e-17	1.54 (1.4, 1.7)
CCL16	1405	0.298355	0.0513577	6.27141e-09	1.35 (1.22, 1.49)
CCL18	1373	0.221967	0.0499052	8.67629e-06	1.25 (1.13, 1.38)
CCL20	1395	0.28601	0.0496442	8.35256e-09	1.33 (1.21, 1.47)
CCL21	1378	0.340128	0.0498452	8.87297e-12	1.41 (1.27, 1.55)
CCL23	1378	0.335657	0.0496225	1.34052e-11	1.4 (1.27, 1.54)
CCL25	1395	0.28327	0.0492627	8.91448e-09	1.33 (1.21, 1.46)
CCL28	1372	0.220195	0.0487882	6.38304e-06	1.25 (1.13, 1.37)
CCL3	1375	0.460367	0.0514926	3.87605e-19	1.58 (1.43, 1.75)
CCN3	1403	0.369685	0.0526066	2.10487e-12	1.45 (1.31, 1.6)
CCN4	1395	0.377829	0.0507475	9.67415e-14	1.46 (1.32, 1.61)
CCN5	1384	0.356918	0.0530762	1.76035e-11	1.43 (1.29, 1.59)
CD14	1358	0.328413	0.0518083	2.31245e-10	1.39 (1.25, 1.54)
CD160	1395	0.333153	0.0495335	1.74601e-11	1.4 (1.27, 1.54)
CD163	1394	0.271952	0.0506838	8.06589e-08	1.31 (1.19, 1.45)
CD164	1384	0.240707	0.0490816	9.37989e-07	1.27 (1.16, 1.4)
CD27	1388	0.489584	0.0514038	1.66178e-21	1.63 (1.48, 1.8)
CD274	1368	0.394414	0.0494406	1.49283e-15	1.48 (1.35, 1.63)
CD276	1375	0.31142	0.0511569	1.14657e-09	1.37 (1.24, 1.51)
CD28	1355	0.275075	0.0512866	8.16329e-08	1.32 (1.19, 1.46)
CD300A	1132	0.389185	0.0604985	1.2514e-10	1.48 (1.31, 1.66)
CD300C	1393	0.347862	0.0518968	2.0423e-11	1.42 (1.28, 1.57)
CD300E	1388	0.500307	0.0531721	4.99887e-21	1.65 (1.49, 1.83)
CD300LF	1395	0.40278	0.0509294	2.6033e-15	1.5 (1.35, 1.65)
CD300LG	1384	0.263234	0.0513612	2.97303e-07	1.3 (1.18, 1.44)
CD302	1370	0.543163	0.0535263	3.39637e-24	1.72 (1.55, 1.91)
CD38	1370	0.36444	0.0532085	7.42223e-12	1.44 (1.3, 1.6)
CD4	1373	0.397682	0.0511925	7.95053e-15	1.49 (1.35, 1.65)
CD46	1381	0.272308	0.0498726	4.75946e-08	1.31 (1.19, 1.45)
CD48	1378	0.272965	0.0503164	5.7967e-08	1.31 (1.19, 1.45)
CD5	1395	0.222056	0.0514251	1.57415e-05	1.25 (1.13, 1.38)
CD59	1342	0.435343	0.053424	3.67479e-16	1.55 (1.39, 1.72)
CD7	1130	0.329065	0.0571593	8.56355e-09	1.39 (1.24, 1.55)
CD72	1132	0.258491	0.0590692	1.20841e-05	1.29 (1.15, 1.45)
CD74	1393	0.509092	0.0523173	2.22708e-22	1.66 (1.5, 1.84)
CD79B	1395	0.460677	0.0520056	8.13024e-19	1.59 (1.43, 1.76)
CD80	1157	0.412426	0.0569105	4.26358e-13	1.51 (1.35, 1.69)
CD83	1375	0.381801	0.0519584	2.00891e-13	1.46 (1.32, 1.62)
CD93	1334	0.317005	0.0512765	6.31878e-10	1.37 (1.24, 1.52)
CD99	1384	0.328176	0.0518304	2.42422e-10	1.39 (1.25, 1.54)
CD99L2	1384	0.308196	0.0518664	2.8136e-09	1.36 (1.23, 1.51)
CDCP1	1368	0.29746	0.0515816	8.08011e-09	1.35 (1.22, 1.49)
CDH1	1333	0.217917	0.0504184	1.54504e-05	1.24 (1.13, 1.37)
CDH2	1392	0.258898	0.0504665	2.89582e-07	1.3 (1.17, 1.43)
CDH3	1393	0.324648	0.049979	8.26512e-11	1.38 (1.25, 1.53)
CDH6	1392	0.262652	0.0504039	1.87883e-07	1.3 (1.18, 1.44)
CDNF	1370	0.317279	0.0502448	2.70756e-10	1.37 (1.24, 1.52)
CDSN	1394	0.25648	0.0489958	1.65216e-07	1.29 (1.17, 1.42)
CEACAM20	1135	0.265479	0.0539635	8.67233e-07	1.3 (1.17, 1.45)
CEACAM5	1345	0.284258	0.0519626	4.48927e-08	1.33 (1.2, 1.47)
CEACAM6	1166	0.356085	0.0609967	5.29021e-09	1.43 (1.27, 1.61)
CELSR2	1132	0.307253	0.0559668	4.02138e-08	1.36 (1.22, 1.52)
CFD	1162	0.393089	0.0591655	3.05506e-11	1.48 (1.32, 1.66)
CGA	1384	0.379247	0.0635756	2.44203e-09	1.46 (1.29, 1.66)
CGREF1	1392	0.235392	0.0502633	2.82467e-06	1.27 (1.15, 1.4)
CHCHD10	1153	0.575871	0.0598568	6.53171e-22	1.78 (1.58, 2)
CHCHD6	1154	0.378007	0.0568345	2.91079e-11	1.46 (1.31, 1.63)
CHGA	1166	0.268994	0.0561069	1.63238e-06	1.31 (1.17, 1.46)
CHGB	1389	0.248638	0.051318	1.26581e-06	1.28 (1.16, 1.42)
CHI3L1	1349	0.334311	0.0525438	1.98474e-10	1.4 (1.26, 1.55)
CHRDL1	1378	0.500106	0.0551796	1.2663e-19	1.65 (1.48, 1.84)
CHRDL2	1392	0.235329	0.0510136	3.9677e-06	1.27 (1.14, 1.4)
CILP	1166	0.335903	0.0582953	8.30703e-09	1.4 (1.25, 1.57)
CKAP4	1388	0.486896	0.0515226	3.38359e-21	1.63 (1.47, 1.8)
CKB	1166	0.419238	0.0624045	1.84152e-11	1.52 (1.35, 1.72)
CLEC10A	1368	0.284324	0.050567	1.87979e-08	1.33 (1.2, 1.47)
CLEC14A	1384	0.429039	0.0502339	1.33279e-17	1.54 (1.39, 1.69)
CLEC1A	1351	0.358814	0.0499101	6.51723e-13	1.43 (1.3, 1.58)
CLEC3B	1145	-0.298117	0.0559606	9.96979e-08	0.74 (0.67, 0.83)
CLEC4D	1375	0.277176	0.0515409	7.54106e-08	1.32 (1.19, 1.46)
CLEC5A	1387	0.311444	0.0532289	4.88534e-09	1.37 (1.23, 1.52)
CLEC6A	1355	0.31043	0.0497284	4.30623e-10	1.36 (1.24, 1.5)
CLEC7A	1395	0.298404	0.0501422	2.66252e-09	1.35 (1.22, 1.49)
CLMP	1395	0.449836	0.0540074	8.14258e-17	1.57 (1.41, 1.74)
CLSTN2	1395	0.303913	0.0497491	1.00307e-09	1.36 (1.23, 1.49)
CLSTN3	1153	0.27804	0.0561991	7.52032e-07	1.32 (1.18, 1.47)
COL15A1	1166	0.363783	0.0577854	3.06562e-10	1.44 (1.28, 1.61)
COL18A1	1392	0.541797	0.0541243	1.37432e-23	1.72 (1.55, 1.91)
COL24A1	1157	0.279852	0.056264	6.56162e-07	1.32 (1.18, 1.48)
COL4A1	1392	0.34078	0.0514036	3.36844e-11	1.41 (1.27, 1.56)
COL5A1	1132	0.373534	0.0582238	1.40377e-10	1.45 (1.3, 1.63)
COL6A3	1405	0.575531	0.0540996	1.97568e-26	1.78 (1.6, 1.98)
COLEC12	1375	0.518176	0.0539012	7.01608e-22	1.68 (1.51, 1.87)
CPXM2	1157	0.363978	0.0570162	1.72796e-10	1.44 (1.29, 1.61)
CR1	1163	0.275212	0.0575098	1.7058e-06	1.32 (1.18, 1.47)
CRELD1	1132	0.299337	0.0582574	2.77427e-07	1.35 (1.2, 1.51)
CRIM1	1378	0.483588	0.0537445	2.30051e-19	1.62 (1.46, 1.8)
CRIP2	1368	0.276342	0.0504429	4.29386e-08	1.32 (1.19, 1.46)
CRLF1	1378	0.254714	0.0512141	6.57495e-07	1.29 (1.17, 1.43)
CRTAM	1368	0.316943	0.0505524	3.61985e-10	1.37 (1.24, 1.52)
CSF1	1378	0.466609	0.0526345	7.64503e-19	1.59 (1.44, 1.77)
CSF2RA	1368	0.227125	0.0484712	2.78906e-06	1.25 (1.14, 1.38)
CSPG4	1166	0.315918	0.0590092	8.61726e-08	1.37 (1.22, 1.54)
CST3	1391	0.532156	0.0531758	1.41292e-23	1.7 (1.53, 1.89)
CST5	1354	0.267684	0.0509128	1.45876e-07	1.31 (1.18, 1.44)
CSTB	1375	0.411425	0.0519059	2.25652e-15	1.51 (1.36, 1.67)
CTHRC1	1166	0.39727	0.0607774	6.29855e-11	1.49 (1.32, 1.68)
CTSB	1392	0.345455	0.0504374	7.42781e-12	1.41 (1.28, 1.56)
CTSL	1392	0.364099	0.0512106	1.16176e-12	1.44 (1.3, 1.59)
CTSS	1082	0.282646	0.057122	7.49338e-07	1.33 (1.19, 1.48)
CTSV	1391	-0.224996	0.0497428	6.09141e-06	0.8 (0.72, 0.88)
CTSZ	1388	0.27292	0.0491707	2.84938e-08	1.31 (1.19, 1.45)
CX3CL1	1368	0.248905	0.0508944	1.00521e-06	1.28 (1.16, 1.42)
CXADR	1375	0.334797	0.0510516	5.45326e-11	1.4 (1.26, 1.54)
CXCL10	1378	0.283251	0.0496353	1.1522e-08	1.33 (1.2, 1.46)
CXCL13	1393	0.290751	0.0501915	6.92073e-09	1.34 (1.21, 1.48)
CXCL16	1403	0.236883	0.0507662	3.06877e-06	1.27 (1.15, 1.4)
CXCL17	1395	0.378663	0.0625043	1.37663e-09	1.46 (1.29, 1.65)
CXCL9	1378	0.450508	0.0524291	8.49349e-18	1.57 (1.42, 1.74)
CYTL1	1166	0.306905	0.0564563	5.44421e-08	1.36 (1.22, 1.52)
DCN	1351	0.233114	0.0520544	7.52456e-06	1.26 (1.14, 1.4)
DDR1	1393	0.236699	0.0488586	1.2688e-06	1.27 (1.15, 1.39)
DEFA1_DEFA1B	1359	0.280433	0.0500766	2.14247e-08	1.32 (1.2, 1.46)
DKK3	1405	0.232943	0.0500763	3.29125e-06	1.26 (1.14, 1.39)
DKK4	1368	0.291441	0.0487656	2.28181e-09	1.34 (1.22, 1.47)
DLL1	1388	0.392921	0.0510177	1.3432e-14	1.48 (1.34, 1.64)
DMD	1120	0.274072	0.0556314	8.36895e-07	1.32 (1.18, 1.47)
DPT	1405	0.309907	0.0562336	3.56685e-08	1.36 (1.22, 1.52)
DPY30	1393	0.281229	0.0490227	9.65333e-09	1.32 (1.2, 1.46)
DSC2	1368	0.401214	0.0510272	3.75796e-15	1.49 (1.35, 1.65)
DTNB	1149	0.407112	0.0591926	6.08004e-12	1.5 (1.34, 1.69)
DTX3	1370	0.506624	0.0516154	9.66922e-23	1.66 (1.5, 1.84)
EBI3_IL27	1394	0.380986	0.0507478	6.02925e-14	1.46 (1.33, 1.62)
EDA2R	1395	0.777439	0.0552126	4.98227e-45	2.18 (1.95, 2.42)
EDN1	1120	0.623099	0.06251	2.10448e-23	1.86 (1.65, 2.11)
EFCAB14	1157	0.424219	0.0578402	2.22843e-13	1.53 (1.36, 1.71)
EFEMP1	1392	0.481399	0.0549869	2.04469e-18	1.62 (1.45, 1.8)
EFHD1	1161	0.25393	0.0561263	6.06085e-06	1.29 (1.15, 1.44)
EFNA1	1383	0.494511	0.0522949	3.19331e-21	1.64 (1.48, 1.82)
EFNA4	1365	0.574044	0.0530459	2.71874e-27	1.78 (1.6, 1.97)
EGFL7	1355	0.324067	0.0500445	9.44479e-11	1.38 (1.25, 1.53)
EGFLAM	1157	0.247694	0.0529976	2.9584e-06	1.28 (1.15, 1.42)
EGFR	1405	-0.214828	0.0496346	1.5034e-05	0.81 (0.73, 0.89)
ELN	1157	0.472802	0.0638654	1.3304e-13	1.6 (1.42, 1.82)
ENAH	1351	0.259799	0.0491228	1.23148e-07	1.3 (1.18, 1.43)
ENPP2	1405	0.278435	0.0554885	5.22422e-07	1.32 (1.18, 1.47)
ENTPD6	1351	0.238302	0.0474654	5.15243e-07	1.27 (1.16, 1.39)
EPHA2	1332	0.473587	0.0529222	3.59547e-19	1.61 (1.45, 1.78)
EPHB4	1405	0.323712	0.0508575	1.95189e-10	1.38 (1.25, 1.53)
EPHB6	1365	0.294522	0.0500015	3.85594e-09	1.34 (1.22, 1.48)
EPO	1375	0.302172	0.0508682	2.84506e-09	1.35 (1.22, 1.49)
EPS8L2	1394	0.231646	0.0484385	1.73328e-06	1.26 (1.15, 1.39)
ESAM	1405	0.271241	0.0500065	5.82411e-08	1.31 (1.19, 1.45)
F10	1164	-0.235878	0.0542644	1.38116e-05	0.79 (0.71, 0.88)
F3	1389	0.284659	0.0507117	1.98516e-08	1.33 (1.2, 1.47)
FABP1	1375	0.289656	0.049898	6.43779e-09	1.34 (1.21, 1.47)
FABP3	1157	0.502584	0.060329	8.03528e-17	1.65 (1.47, 1.86)
FABP4	1405	0.528286	0.0593226	5.32427e-19	1.7 (1.51, 1.91)
FABP5	1386	0.211247	0.0485754	1.36852e-05	1.24 (1.12, 1.36)
FAM3B	1370	0.349668	0.0499533	2.56172e-12	1.42 (1.29, 1.56)
FAM3C	1391	0.416641	0.0512524	4.32147e-16	1.52 (1.37, 1.68)
FAS	1400	0.281407	0.0505049	2.51999e-08	1.32 (1.2, 1.46)
FBLN2	1166	0.486994	0.0595853	3.0068e-16	1.63 (1.45, 1.83)
FCGR2A	1383	0.228386	0.0504935	6.0949e-06	1.26 (1.14, 1.39)
FCN1	1164	0.286531	0.0558554	2.89944e-07	1.33 (1.19, 1.49)
FGF12	1133	0.234606	0.0541702	1.48498e-05	1.26 (1.14, 1.41)
FGF21	1394	0.257774	0.0524452	8.87276e-07	1.29 (1.17, 1.43)
FGF23	1390	0.470122	0.0516753	9.23486e-20	1.6 (1.45, 1.77)
FGF5	1351	0.247516	0.0501894	8.15409e-07	1.28 (1.16, 1.41)
FGFBP2	1166	-0.235114	0.0544045	1.54905e-05	0.79 (0.71, 0.88)
FGFR2	1388	0.309169	0.0517641	2.33437e-09	1.36 (1.23, 1.51)
FGL1	1164	0.338859	0.0585414	7.10759e-09	1.4 (1.25, 1.57)
FLRT2	1368	0.304171	0.0504924	1.70052e-09	1.36 (1.23, 1.5)
FLT1	1368	0.269318	0.049174	4.33004e-08	1.31 (1.19, 1.44)
FOLR1	1385	0.379324	0.0520583	3.18071e-13	1.46 (1.32, 1.62)
FOLR2	1393	0.300901	0.0517889	6.24152e-09	1.35 (1.22, 1.5)
FSTL1	1120	0.378187	0.0577874	5.97149e-11	1.46 (1.3, 1.63)
FSTL3	1372	0.605049	0.0553408	8.00227e-28	1.83 (1.64, 2.04)
GALNT3	1351	0.229012	0.0487492	2.63041e-06	1.26 (1.14, 1.38)
GAST	1153	0.247503	0.0548511	6.41351e-06	1.28 (1.15, 1.43)
GCHFR	1099	0.285348	0.0566863	4.80848e-07	1.33 (1.19, 1.49)
GCNT1	1370	0.21493	0.0492328	1.26776e-05	1.24 (1.13, 1.37)
GDF15	1405	0.732718	0.0581014	1.83572e-36	2.08 (1.86, 2.33)
GFRA1	1394	0.409995	0.0521095	3.60491e-15	1.51 (1.36, 1.67)
GGT5	1368	0.470247	0.0530237	7.40529e-19	1.6 (1.44, 1.78)
GIPC2	1153	0.400536	0.0569946	2.10081e-12	1.49 (1.33, 1.67)
GM2A	1145	0.439114	0.0590791	1.06441e-13	1.55 (1.38, 1.74)
GPKOW	1337	0.245163	0.0481658	3.58102e-07	1.28 (1.16, 1.4)
GPNMB	1344	0.217195	0.0491696	9.99605e-06	1.24 (1.13, 1.37)
GPR37	1351	0.410124	0.0510078	8.95254e-16	1.51 (1.36, 1.67)
GRN	1378	0.315792	0.0505679	4.24033e-10	1.37 (1.24, 1.51)
GRP	1120	0.262312	0.0553357	2.13317e-06	1.3 (1.17, 1.45)
GRPEL1	1370	0.241595	0.0497207	1.17957e-06	1.27 (1.16, 1.4)
GUCA2A	1376	0.411934	0.0506549	4.21704e-16	1.51 (1.37, 1.67)
HAVCR1	1395	0.431591	0.0518771	8.83414e-17	1.54 (1.39, 1.7)
HAVCR2	1384	0.397705	0.0522402	2.67817e-14	1.49 (1.34, 1.65)
HGF	1395	0.435755	0.0556834	5.05313e-15	1.55 (1.39, 1.72)
HIP1R	1152	0.397073	0.055785	1.09577e-12	1.49 (1.33, 1.66)
HLA-E	1375	0.480801	0.0515501	1.09049e-20	1.62 (1.46, 1.79)
HMOX2	1337	0.220357	0.0483926	5.27568e-06	1.25 (1.13, 1.37)
HNMT	1362	0.269219	0.0501402	7.90291e-08	1.31 (1.19, 1.44)
HRC	1120	0.353838	0.0562124	3.08074e-10	1.42 (1.28, 1.59)
HS6ST2	1133	0.284893	0.0570275	5.8616e-07	1.33 (1.19, 1.49)
HSPB6	1395	0.434352	0.0526649	1.61794e-16	1.54 (1.39, 1.71)
HSPG2	1378	0.506758	0.053254	1.80205e-21	1.66 (1.5, 1.84)
HYAL1	1375	0.246123	0.0489108	4.85199e-07	1.28 (1.16, 1.41)
HYOU1	1405	0.217296	0.0486261	7.86876e-06	1.24 (1.13, 1.37)
ICAM1	1384	0.384854	0.052648	2.67249e-13	1.47 (1.33, 1.63)
ICAM3	1405	0.249909	0.048824	3.07843e-07	1.28 (1.17, 1.41)
ICAM5	1392	0.422479	0.0522432	6.12681e-16	1.53 (1.38, 1.69)
IFI30	1126	0.469851	0.0590379	1.74184e-15	1.6 (1.42, 1.8)
IFNGR1	1378	0.296376	0.0504929	4.36708e-09	1.34 (1.22, 1.48)
IGF1R	1370	0.333043	0.0505206	4.33255e-11	1.4 (1.26, 1.54)
IGF2R	1384	0.229072	0.0497946	4.21794e-06	1.26 (1.14, 1.39)
IGFBP2	1404	0.413118	0.0548341	4.92217e-14	1.51 (1.36, 1.68)
IGFBP4	1363	0.615267	0.0544175	1.21954e-29	1.85 (1.66, 2.06)
IGFBP6	1386	0.30318	0.0531624	1.17779e-08	1.35 (1.22, 1.5)
IGFBP7	1405	0.471384	0.0522677	1.90439e-19	1.6 (1.45, 1.78)
IGFBPL1	1392	0.477156	0.0550234	4.25028e-18	1.61 (1.45, 1.79)
IGLC2	1161	0.347507	0.0566072	8.30891e-10	1.42 (1.27, 1.58)
IGSF3	1370	0.22723	0.0522905	1.3894e-05	1.26 (1.13, 1.39)
IGSF8	1392	0.328758	0.0522773	3.20079e-10	1.39 (1.25, 1.54)
IL10RB	1378	0.388599	0.0519549	7.45784e-14	1.47 (1.33, 1.63)
IL12A_IL12B	1370	0.330157	0.0524864	3.16801e-10	1.39 (1.26, 1.54)
IL12B	1395	0.284154	0.0512622	2.97071e-08	1.33 (1.2, 1.47)
IL12RB1	1351	0.319438	0.0498324	1.45276e-10	1.38 (1.25, 1.52)
IL15	1375	0.237516	0.0497629	1.81551e-06	1.27 (1.15, 1.4)
IL15RA	1351	0.310165	0.0504262	7.70588e-10	1.36 (1.24, 1.51)
IL17D	1351	0.245593	0.0522694	2.61953e-06	1.28 (1.15, 1.42)
IL18BP	1394	0.415094	0.05136	6.36797e-16	1.51 (1.37, 1.67)
IL18R1	1395	0.234715	0.0520678	6.54825e-06	1.26 (1.14, 1.4)
IL19	1365	0.309515	0.050234	7.20743e-10	1.36 (1.23, 1.5)
IL1R1	1383	0.244752	0.0497288	8.57797e-07	1.28 (1.16, 1.41)
IL1RL1	1400	0.301351	0.0513814	4.49213e-09	1.35 (1.22, 1.49)
IL1RN	1368	0.258349	0.0556687	3.47012e-06	1.29 (1.16, 1.44)
IL2RA	1379	0.437085	0.0520609	4.63395e-17	1.55 (1.4, 1.71)
IL4R	1375	0.353733	0.0508218	3.39659e-12	1.42 (1.29, 1.57)
IL5RA	1375	0.214565	0.0496084	1.52416e-05	1.24 (1.12, 1.37)
IL6	1370	0.349293	0.0498364	2.40382e-12	1.42 (1.29, 1.56)
IL6ST	1392	0.283266	0.0492051	8.57013e-09	1.33 (1.21, 1.46)
IMMT	1154	0.416414	0.0563611	1.4869e-13	1.52 (1.36, 1.69)
INHBB	1132	0.400252	0.0597533	2.10687e-11	1.49 (1.33, 1.68)
INSL4	1154	0.292804	0.0546093	8.24001e-08	1.34 (1.2, 1.49)
INSL5	1157	0.320035	0.0576833	2.88714e-08	1.38 (1.23, 1.54)
ITGA5	1384	0.229666	0.0515262	8.30075e-06	1.26 (1.14, 1.39)
ITGBL1	1166	0.430505	0.0613042	2.1803e-12	1.54 (1.36, 1.73)
ITIH3	1394	0.261293	0.0515276	3.9586e-07	1.3 (1.17, 1.44)
JAM2	1393	0.304647	0.050487	1.59777e-09	1.36 (1.23, 1.5)
JUN	1351	0.259412	0.0481597	7.1843e-08	1.3 (1.18, 1.42)
KIF1C	1129	0.314262	0.055451	1.44996e-08	1.37 (1.23, 1.53)
KLK10	1388	0.252022	0.0492428	3.08865e-07	1.29 (1.17, 1.42)
KLK11	1376	0.39835	0.0503113	2.41937e-15	1.49 (1.35, 1.64)
KLK4	1395	0.464157	0.0530493	2.14232e-18	1.59 (1.43, 1.76)
KLRB1	1395	0.272235	0.0502446	6.02074e-08	1.31 (1.19, 1.45)
KLRK1	1153	0.272396	0.0559818	1.13999e-06	1.31 (1.18, 1.47)
KRT19	1374	0.30509	0.0493191	6.16922e-10	1.36 (1.23, 1.49)
LAG3	1370	0.337563	0.0493631	8.00952e-12	1.4 (1.27, 1.54)
LAIR1	1375	0.555601	0.0528579	7.66945e-26	1.74 (1.57, 1.93)
LAIR2	1368	0.260837	0.0488339	9.22738e-08	1.3 (1.18, 1.43)
LAMA4	1378	0.26241	0.0495856	1.20953e-07	1.3 (1.18, 1.43)
LAMP3	1393	0.444902	0.0560092	1.96754e-15	1.56 (1.4, 1.74)
LAYN	1365	0.536531	0.0512646	1.23888e-25	1.71 (1.55, 1.89)
LCN2	1339	0.30148	0.0519694	6.58756e-09	1.35 (1.22, 1.5)
LGALS1	1392	0.290661	0.0512968	1.45945e-08	1.34 (1.21, 1.48)
LGALS3BP	1162	0.272513	0.0566429	1.50126e-06	1.31 (1.18, 1.47)
LGALS4	1375	0.371846	0.0501107	1.16694e-13	1.45 (1.31, 1.6)
LGALS7_LGALS7B	1382	0.259789	0.0505934	2.82366e-07	1.3 (1.17, 1.43)
LGALS9	1373	0.601135	0.0538928	6.82397e-29	1.82 (1.64, 2.03)
LIFR	1375	0.391757	0.0502886	6.6917e-15	1.48 (1.34, 1.63)
LILRA5	1391	0.272154	0.0511885	1.05666e-07	1.31 (1.19, 1.45)
LILRB2	1399	0.303587	0.0499508	1.21899e-09	1.35 (1.23, 1.49)
LILRB4	1351	0.387973	0.052628	1.6811e-13	1.47 (1.33, 1.63)
LMNB1	1156	0.26215	0.0536396	1.02253e-06	1.3 (1.17, 1.44)
LMNB2	1153	0.425461	0.0598932	1.21489e-12	1.53 (1.36, 1.72)
LMOD1	1161	0.448315	0.0597297	6.10861e-14	1.57 (1.39, 1.76)
LPCAT2	1370	0.230075	0.0483586	1.95826e-06	1.26 (1.14, 1.38)
LRIG3	1127	0.260201	0.0556403	2.91832e-06	1.3 (1.16, 1.45)
LRP11	1392	0.376429	0.0517943	3.65463e-13	1.46 (1.32, 1.61)
LRRC25	1370	0.305079	0.0506781	1.74483e-09	1.36 (1.23, 1.5)
LTBP2	1405	0.611214	0.0562488	1.66893e-27	1.84 (1.65, 2.06)
LTBP3	1355	0.286315	0.0496025	7.82488e-09	1.33 (1.21, 1.47)
LTBR	1368	0.419663	0.0508692	1.58602e-16	1.52 (1.38, 1.68)
LY6D	1363	0.411192	0.0516767	1.76235e-15	1.51 (1.36, 1.67)
LY9	1365	0.321482	0.0512011	3.41158e-10	1.38 (1.25, 1.52)
LY96	1368	0.288876	0.0497602	6.42281e-09	1.33 (1.21, 1.47)
MAD1L1	1363	0.35191	0.0490149	6.98929e-13	1.42 (1.29, 1.57)
MAMDC2	1157	0.420435	0.0585649	7.02405e-13	1.52 (1.36, 1.71)
MANSC1	1388	0.244581	0.0498839	9.43835e-07	1.28 (1.16, 1.41)
MATN2	1376	0.243027	0.0497779	1.04896e-06	1.28 (1.16, 1.41)
MB	1405	0.244641	0.0517527	2.27723e-06	1.28 (1.15, 1.41)
MDK	1384	0.30137	0.0494134	1.06764e-09	1.35 (1.23, 1.49)
MERTK	1395	0.250914	0.0487158	2.59708e-07	1.29 (1.17, 1.41)
MFAP4	1132	0.410452	0.0598989	7.26144e-12	1.51 (1.34, 1.7)
MIA	1388	0.226721	0.0495168	4.6794e-06	1.25 (1.14, 1.38)
MILR1	1351	0.231622	0.0502298	4.00278e-06	1.26 (1.14, 1.39)
MMP10	1374	0.2301	0.0496265	3.54133e-06	1.26 (1.14, 1.39)
MMP12	1388	0.399106	0.0542022	1.79443e-13	1.49 (1.34, 1.66)
MMP3	1384	0.243734	0.0531706	4.56152e-06	1.28 (1.15, 1.42)
MMP7	1350	0.389963	0.0505676	1.2415e-14	1.48 (1.34, 1.63)
MOG	1395	0.278778	0.0506765	3.77395e-08	1.32 (1.2, 1.46)
MRC1	1164	0.329723	0.057466	9.59719e-09	1.39 (1.24, 1.56)
MSLN	1369	0.282594	0.0525878	7.71123e-08	1.33 (1.2, 1.47)
MSR1	1393	0.340041	0.0514817	3.97273e-11	1.41 (1.27, 1.55)
MYBPC1	1157	0.253704	0.0561538	6.24205e-06	1.29 (1.15, 1.44)
MZB1	1376	0.354547	0.0502197	1.66592e-12	1.43 (1.29, 1.57)
NBL1	1388	0.401842	0.0509951	3.27342e-15	1.49 (1.35, 1.65)
NCR1	1374	0.331953	0.0519218	1.62313e-10	1.39 (1.26, 1.54)
NCR3LG1	1157	0.375787	0.0579317	8.77237e-11	1.46 (1.3, 1.63)
NCS1	1395	0.267825	0.0493528	5.73893e-08	1.31 (1.19, 1.44)
NDUFS6	1355	0.244754	0.0478251	3.09301e-07	1.28 (1.16, 1.4)
NECTIN2	1391	0.413848	0.0514736	8.98442e-16	1.51 (1.37, 1.67)
NECTIN4	1388	0.358615	0.0505044	1.2415e-12	1.43 (1.3, 1.58)
NEFL	1334	0.424235	0.0538981	3.51648e-15	1.53 (1.38, 1.7)
NELL1	1388	-0.383333	0.0508882	4.96463e-14	0.68 (0.62, 0.75)
NFASC	1395	0.346418	0.0527695	5.21224e-11	1.41 (1.28, 1.57)
NHLRC3	1103	0.291291	0.0599674	1.18879e-06	1.34 (1.19, 1.51)
NOS1	1337	0.414893	0.0525481	2.89153e-15	1.51 (1.37, 1.68)
NOS3	1337	0.286743	0.0506102	1.46405e-08	1.33 (1.21, 1.47)
NOTCH3	1405	0.31813	0.0527713	1.65532e-09	1.37 (1.24, 1.52)
NPC2	1151	0.6418	0.0612456	1.07756e-25	1.9 (1.68, 2.14)
NPDC1	1392	0.507542	0.0538515	4.30783e-21	1.66 (1.49, 1.85)
NPL	1157	0.32225	0.0571625	1.72596e-08	1.38 (1.23, 1.54)
NPPB	1351	0.353163	0.0509044	3.98353e-12	1.42 (1.29, 1.57)
NPPC	1375	0.336729	0.0528386	1.85628e-10	1.4 (1.26, 1.55)
NRCAM	1392	0.240714	0.0496768	1.26233e-06	1.27 (1.15, 1.4)
NRP1	1396	0.303612	0.0482994	3.25663e-10	1.35 (1.23, 1.49)
NRP2	1384	0.361415	0.0494637	2.7385e-13	1.44 (1.3, 1.58)
NT5C1A	1153	0.491234	0.0605827	5.12491e-16	1.63 (1.45, 1.84)
NTproBNP	1392	0.544444	0.051287	2.52119e-26	1.72 (1.56, 1.91)
NUCB2	1387	0.307924	0.0485697	2.29997e-10	1.36 (1.24, 1.5)
NXPH3	1133	0.301953	0.0580197	1.94713e-07	1.35 (1.21, 1.52)
OCLN	1161	0.583924	0.0601973	3.01031e-22	1.79 (1.59, 2.02)
OGN	1384	0.459064	0.0531448	5.72126e-18	1.58 (1.43, 1.76)
OSCAR	1376	0.28653	0.0504303	1.33352e-08	1.33 (1.21, 1.47)
OSMR	1396	0.345384	0.05172	2.42286e-11	1.41 (1.28, 1.56)
PALM	1150	0.333782	0.0612325	5.00727e-08	1.4 (1.24, 1.57)
PALM2	1153	0.538465	0.0620908	4.23765e-18	1.71 (1.52, 1.94)
PBXIP1	1157	0.250189	0.056668	1.01009e-05	1.28 (1.15, 1.44)
PCDH17	1392	0.256562	0.0499316	2.77265e-07	1.29 (1.17, 1.43)
PCDH7	1157	0.250207	0.0536807	3.14631e-06	1.28 (1.16, 1.43)
PDCD1	1391	0.330641	0.0493153	2.01911e-11	1.39 (1.26, 1.53)
PDCD1LG2	1370	0.281513	0.0482447	5.37527e-09	1.33 (1.21, 1.46)
PDGFRA	1392	0.246412	0.0501738	9.05382e-07	1.28 (1.16, 1.41)
PDIA3	1132	0.28207	0.0570367	7.59805e-07	1.33 (1.19, 1.48)
PENK	1132	0.321655	0.0568984	1.5754e-08	1.38 (1.23, 1.54)
PGF	1395	0.53977	0.0535719	7.08074e-24	1.72 (1.54, 1.91)
PGLYRP1	1399	0.246455	0.0509467	1.31485e-06	1.28 (1.16, 1.41)
PHLDB1	1157	0.27626	0.0579693	1.88268e-06	1.32 (1.18, 1.48)
PHOSPHO1	1368	0.29982	0.0506183	3.15833e-09	1.35 (1.22, 1.49)
PI3	1375	0.245933	0.0502832	1.00345e-06	1.28 (1.16, 1.41)
PIGR	1366	0.491096	0.058036	2.62995e-17	1.63 (1.46, 1.83)
PIK3IP1	1384	0.44803	0.0520587	7.54943e-18	1.57 (1.41, 1.73)
PILRA	1384	0.387346	0.0512601	4.14113e-14	1.47 (1.33, 1.63)
PILRB	1392	0.311097	0.0513937	1.41987e-09	1.36 (1.23, 1.51)
PKD1	1157	0.242365	0.0548883	1.00731e-05	1.27 (1.14, 1.42)
PKD2	1129	0.251439	0.0553358	5.52278e-06	1.29 (1.15, 1.43)
PLA2G15	1388	0.221447	0.0502689	1.05661e-05	1.25 (1.13, 1.38)
PLA2G2A	1383	0.226125	0.0510802	9.56177e-06	1.25 (1.13, 1.39)
PLAU	1384	0.250473	0.0498047	4.92802e-07	1.28 (1.17, 1.42)
PLAUR	1368	0.681078	0.0583462	1.75036e-31	1.98 (1.76, 2.22)
PLXDC2	1153	0.246495	0.0553502	8.45318e-06	1.28 (1.15, 1.43)
PLXNB2	1398	0.27107	0.0496083	4.64983e-08	1.31 (1.19, 1.45)
POLR2F	1370	0.334761	0.0498624	1.89759e-11	1.4 (1.27, 1.54)
PPL	1133	0.28892	0.0568029	3.65008e-07	1.33 (1.19, 1.49)
PPP1R14D	1161	0.255372	0.0539972	2.25238e-06	1.29 (1.16, 1.44)
PRAP1	1166	0.319059	0.0589799	6.31564e-08	1.38 (1.23, 1.54)
PRELP	1375	0.337176	0.0522023	1.05386e-10	1.4 (1.26, 1.55)
PRG2	1166	0.313129	0.0569217	3.77559e-08	1.37 (1.22, 1.53)
PRSS2	1394	0.290688	0.0494642	4.1846e-09	1.34 (1.21, 1.47)
PRSS22	1133	0.342883	0.0562958	1.12392e-09	1.41 (1.26, 1.57)
PRSS8	1368	0.412511	0.0541155	2.4825e-14	1.51 (1.36, 1.68)
PSAP	1158	0.496959	0.0584606	1.88354e-17	1.64 (1.47, 1.84)
PSG1	1368	0.306114	0.0509912	1.93368e-09	1.36 (1.23, 1.5)
PTGDS	1374	0.416765	0.0517684	8.24052e-16	1.52 (1.37, 1.68)
PTH1R	1375	0.216523	0.0491972	1.0769e-05	1.24 (1.13, 1.37)
PTK7	1337	0.235935	0.0493269	1.72628e-06	1.27 (1.15, 1.39)
PTN	1351	0.305319	0.0532741	9.97816e-09	1.36 (1.22, 1.51)
PTPRN2	1365	0.388398	0.0515271	4.782e-14	1.47 (1.33, 1.63)
PTX3	1375	0.287486	0.049935	8.55144e-09	1.33 (1.21, 1.47)
PYY	1129	0.245165	0.0545175	6.89218e-06	1.28 (1.15, 1.42)
QPCT	1389	0.253611	0.0513913	8.01907e-07	1.29 (1.17, 1.43)
QSOX1	1150	0.314611	0.060114	1.66261e-07	1.37 (1.22, 1.54)
RARRES1	1355	0.218286	0.0497082	1.12657e-05	1.24 (1.13, 1.37)
RARRES2	1396	0.274043	0.0520768	1.4227e-07	1.32 (1.19, 1.46)
RBFOX3	1161	0.561182	0.0598762	7.09131e-21	1.75 (1.56, 1.97)
RBP1	1130	0.241523	0.054893	1.08312e-05	1.27 (1.14, 1.42)
RBP2	1370	0.261728	0.0493661	1.14683e-07	1.3 (1.18, 1.43)
RBP5	1370	0.37713	0.0515114	2.45598e-13	1.46 (1.32, 1.61)
RBP7	1157	0.342949	0.0548124	3.93031e-10	1.41 (1.27, 1.57)
REG1A	1381	0.378638	0.0496262	2.35102e-14	1.46 (1.32, 1.61)
REG1B	1405	0.323156	0.0482875	2.19636e-11	1.38 (1.26, 1.52)
REG3A	1405	0.39395	0.0522252	4.58238e-14	1.48 (1.34, 1.64)
REG4	1376	0.316134	0.049603	1.85029e-10	1.37 (1.24, 1.51)
RELT	1384	0.560232	0.0518617	3.35199e-27	1.75 (1.58, 1.94)
REN	1392	0.436144	0.0515589	2.69352e-17	1.55 (1.4, 1.71)
RETN	1382	0.241663	0.0508101	1.97258e-06	1.27 (1.15, 1.41)
RNASE1	1164	0.552471	0.0595569	1.75387e-20	1.74 (1.55, 1.95)
RNASE10	1120	0.356499	0.0582079	9.09203e-10	1.43 (1.27, 1.6)
RNASE4	1123	0.530062	0.0600227	1.03725e-18	1.7 (1.51, 1.91)
RNASE6	1156	0.572431	0.0577112	3.4452e-23	1.77 (1.58, 1.98)
RNASET2	1399	0.352085	0.050235	2.40463e-12	1.42 (1.29, 1.57)
RNF149	1120	0.350305	0.0582621	1.82599e-09	1.42 (1.27, 1.59)
ROBO1	1376	0.229846	0.0498436	4.00056e-06	1.26 (1.14, 1.39)
ROR1	1392	0.252613	0.0508621	6.81283e-07	1.29 (1.17, 1.42)
RSPO1	1368	0.445084	0.0536685	1.10245e-16	1.56 (1.4, 1.73)
RSPO3	1395	0.450927	0.0531454	2.16122e-17	1.57 (1.41, 1.74)
RTBDN	1370	0.299185	0.0516142	6.76896e-09	1.35 (1.22, 1.49)
SCARA5	1393	0.336047	0.0508315	3.81725e-11	1.4 (1.27, 1.55)
SCARB2	1333	0.593576	0.0562051	4.52354e-26	1.81 (1.62, 2.02)
SCARF1	1405	0.242391	0.0485587	5.98469e-07	1.27 (1.16, 1.4)
SCARF2	1393	0.442655	0.0532674	9.56577e-17	1.56 (1.4, 1.73)
SCG2	1386	0.339442	0.0488927	3.84983e-12	1.4 (1.28, 1.55)
SCGB1A1	1376	0.375211	0.0520262	5.51527e-13	1.46 (1.31, 1.61)
SCGB3A1	1132	0.346211	0.0589965	4.40203e-09	1.41 (1.26, 1.59)
SCGN	1351	0.223721	0.0492563	5.57288e-06	1.25 (1.14, 1.38)
SCN4B	1120	0.262338	0.0567838	3.83845e-06	1.3 (1.16, 1.45)
SCRG1	1157	0.375239	0.0582623	1.19079e-10	1.46 (1.3, 1.63)
SDC1	1392	0.312183	0.0503359	5.57543e-10	1.37 (1.24, 1.51)
SDC4	1392	-0.25199	0.0506282	6.44844e-07	0.78 (0.7, 0.86)
SEL1L	1120	0.437342	0.0572503	2.18708e-14	1.55 (1.38, 1.73)
SEMA3F	1392	0.326332	0.0509936	1.55909e-10	1.39 (1.25, 1.53)
SEMA3G	1132	0.28425	0.0565886	5.08438e-07	1.33 (1.19, 1.48)
SEPTIN8	1150	0.588882	0.0589093	1.58e-23	1.8 (1.61, 2.02)
SERPINB8	1395	0.24543	0.0479785	3.13028e-07	1.28 (1.16, 1.4)
SEZ6L2	1370	0.357482	0.0514532	3.71238e-12	1.43 (1.29, 1.58)
SFRP1	1365	0.395257	0.0529294	8.16556e-14	1.48 (1.34, 1.65)
SFTPA1	1355	0.22331	0.0499443	7.77887e-06	1.25 (1.13, 1.38)
SFTPA2	1355	0.240616	0.0521108	3.88585e-06	1.27 (1.15, 1.41)
SFTPD	1392	0.24012	0.0497436	1.38502e-06	1.27 (1.15, 1.4)
SHISA5	1166	0.603929	0.0606115	2.19189e-23	1.83 (1.62, 2.06)
SIGLEC1	1378	0.331107	0.0514021	1.18289e-10	1.39 (1.26, 1.54)
SIGLEC10	1375	0.396926	0.0518574	1.94526e-14	1.49 (1.34, 1.65)
SIGLEC6	1395	0.229365	0.0496152	3.78471e-06	1.26 (1.14, 1.39)
SIGLEC8	1120	0.304921	0.0563111	6.13116e-08	1.36 (1.21, 1.51)
SIL1	1120	0.244886	0.0548372	7.98126e-06	1.28 (1.15, 1.42)
SIRPB1	1373	0.279979	0.050235	2.49826e-08	1.32 (1.2, 1.46)
SLAMF1	1351	0.293865	0.0503922	5.49145e-09	1.34 (1.22, 1.48)
SLAMF7	1375	0.291803	0.0492261	3.06974e-09	1.34 (1.22, 1.47)
SLAMF8	1355	0.317081	0.0511548	5.70202e-10	1.37 (1.24, 1.52)
SLURP1	1161	0.251407	0.0563345	8.09157e-06	1.29 (1.15, 1.44)
SMOC1	1395	0.36115	0.0505602	9.13347e-13	1.43 (1.3, 1.58)
SMOC2	1378	0.371145	0.0500836	1.2581e-13	1.45 (1.31, 1.6)
SNCG	1368	0.39441	0.0561157	2.08753e-12	1.48 (1.33, 1.66)
SNED1	1120	0.281308	0.0555712	4.14596e-07	1.32 (1.19, 1.48)
SNRPB2	1153	0.363804	0.0555225	5.66292e-11	1.44 (1.29, 1.6)
SORBS1	1161	0.250641	0.056712	9.89124e-06	1.28 (1.15, 1.44)
SORCS2	1355	0.500286	0.0532933	6.14967e-21	1.65 (1.49, 1.83)
SPARCL1	1389	0.22528	0.0499309	6.42676e-06	1.25 (1.14, 1.38)
SPINK1	1384	0.474613	0.0516248	3.80282e-20	1.61 (1.45, 1.78)
SPINK4	1375	0.406196	0.0509111	1.48077e-15	1.5 (1.36, 1.66)
SPINT1	1382	0.334297	0.050945	5.31156e-11	1.4 (1.26, 1.54)
SPON1	1376	0.548119	0.0520528	6.27924e-26	1.73 (1.56, 1.92)
SPON2	1388	0.505753	0.0535873	3.80245e-21	1.66 (1.49, 1.84)
SPP1	1404	0.396422	0.051338	1.14695e-14	1.49 (1.34, 1.64)
SRPX	1157	0.391598	0.0585631	2.28152e-11	1.48 (1.32, 1.66)
ST6GAL1	1405	0.209161	0.048181	1.41734e-05	1.23 (1.12, 1.35)
STC1	1393	0.354466	0.0509363	3.42681e-12	1.43 (1.29, 1.58)
STC2	1379	0.309385	0.052363	3.45302e-09	1.36 (1.23, 1.51)
SUSD2	1384	0.237381	0.0509872	3.22872e-06	1.27 (1.15, 1.4)
TAFA5	1370	0.37279	0.0522106	9.32563e-13	1.45 (1.31, 1.61)
TCN2	1404	0.228122	0.0486952	2.80394e-06	1.26 (1.14, 1.38)
TCOF1	1157	0.288691	0.0547989	1.37774e-07	1.33 (1.2, 1.49)
TFF1	1382	0.310146	0.0514856	1.7022e-09	1.36 (1.23, 1.51)
TFF2	1378	0.397239	0.0534981	1.12527e-13	1.49 (1.34, 1.65)
TFF3	1386	0.598674	0.0513052	1.83797e-31	1.82 (1.65, 2.01)
TFPI2	1386	0.370912	0.0524513	1.53212e-12	1.45 (1.31, 1.61)
TFRC	1392	0.268174	0.04962	6.49682e-08	1.31 (1.19, 1.44)
TGFA	1375	0.356453	0.0517026	5.41296e-12	1.43 (1.29, 1.58)
TGFB1	1393	0.236218	0.049046	1.46271e-06	1.27 (1.15, 1.39)
TGFBR1	1133	0.249794	0.0564811	9.75156e-06	1.28 (1.15, 1.43)
TGFBR2	1388	0.415123	0.0522093	1.84814e-15	1.51 (1.37, 1.68)
TGOLN2	1164	0.261467	0.05556	2.52584e-06	1.3 (1.16, 1.45)
THBS2	1384	0.41508	0.0542	1.88424e-14	1.51 (1.36, 1.68)
THY1	1393	0.384173	0.0529511	4.00971e-13	1.47 (1.32, 1.63)
TIMP1	1373	0.466062	0.0523258	5.24691e-19	1.59 (1.44, 1.77)
TIMP2	1157	0.247115	0.0556238	8.88681e-06	1.28 (1.15, 1.43)
TIMP4	1384	0.401702	0.0516503	7.40593e-15	1.49 (1.35, 1.65)
TINAGL1	1389	0.315624	0.0505353	4.22163e-10	1.37 (1.24, 1.51)
TMSB10	1384	0.236628	0.0494204	1.68405e-06	1.27 (1.15, 1.4)
TNC	1394	0.295161	0.0487336	1.39009e-09	1.34 (1.22, 1.48)
TNF	1348	0.41614	0.0502046	1.14317e-16	1.52 (1.37, 1.67)
TNFRSF10A	1368	0.505126	0.0523904	5.33687e-22	1.66 (1.5, 1.84)
TNFRSF10B	1368	0.721326	0.0559887	5.58079e-38	2.06 (1.84, 2.3)
TNFRSF11A	1395	0.465776	0.0520051	3.35558e-19	1.59 (1.44, 1.76)
TNFRSF11B	1375	0.323089	0.0508311	2.06905e-10	1.38 (1.25, 1.53)
TNFRSF12A	1388	0.62036	0.0528017	7.15653e-32	1.86 (1.68, 2.06)
TNFRSF13B	1376	0.388232	0.0506153	1.7167e-14	1.47 (1.34, 1.63)
TNFRSF14	1376	0.394974	0.0507187	6.83239e-15	1.48 (1.34, 1.64)
TNFRSF17	1132	0.390948	0.0570545	7.27294e-12	1.48 (1.32, 1.65)
TNFRSF19	1395	0.41605	0.0512866	4.96858e-16	1.52 (1.37, 1.68)
TNFRSF1A	1384	0.519514	0.0528443	8.27609e-23	1.68 (1.52, 1.86)
TNFRSF1B	1384	0.497748	0.0517375	6.54248e-22	1.65 (1.49, 1.82)
TNFRSF21	1393	0.333844	0.0509096	5.4685e-11	1.4 (1.26, 1.54)
TNFRSF4	1393	0.528623	0.0519207	2.40194e-24	1.7 (1.53, 1.88)
TNFRSF6B	1368	0.520221	0.0509413	1.7491e-24	1.68 (1.52, 1.86)
TNFRSF8	1393	0.344521	0.0505784	9.65062e-12	1.41 (1.28, 1.56)
TNFRSF9	1368	0.498777	0.0523545	1.62014e-21	1.65 (1.49, 1.82)
TNFSF13	1378	0.359266	0.0516201	3.40739e-12	1.43 (1.29, 1.58)
TNFSF13B	1403	0.321144	0.0524636	9.28354e-10	1.38 (1.24, 1.53)
TNFSF8	1166	0.249256	0.0544085	4.62319e-06	1.28 (1.15, 1.43)
TPR	1129	0.263417	0.0536037	8.91632e-07	1.3 (1.17, 1.45)
TREM2	1375	0.249765	0.0522055	1.71612e-06	1.28 (1.16, 1.42)
TXNDC15	1388	0.26687	0.0496584	7.69636e-08	1.31 (1.18, 1.44)
ULBP2	1368	0.507037	0.0510357	2.93338e-23	1.66 (1.5, 1.84)
UMOD	1396	-0.503203	0.0511725	8.07866e-23	0.6 (0.55, 0.67)
USP28	1153	0.322072	0.056185	9.90438e-09	1.38 (1.24, 1.54)
VCAM1	1393	0.392303	0.0514141	2.343e-14	1.48 (1.34, 1.64)
VEGFA	1391	0.249242	0.0483392	2.52135e-07	1.28 (1.17, 1.41)
VEGFB	1133	0.353871	0.0601807	4.09933e-09	1.42 (1.27, 1.6)
VEGFD	1394	0.354561	0.051198	4.35097e-12	1.43 (1.29, 1.58)
VSIG2	1154	0.320905	0.0581128	3.34958e-08	1.38 (1.23, 1.54)
VSIG4	1379	0.516529	0.0530361	2.0517e-22	1.68 (1.51, 1.86)
VWA1	1394	0.222793	0.0494931	6.74784e-06	1.25 (1.13, 1.38)
VWC2	1362	0.340024	0.051882	5.60912e-11	1.4 (1.27, 1.56)
WFDC1	1135	0.240482	0.0556339	1.54217e-05	1.27 (1.14, 1.42)
WFDC12	1394	0.266455	0.051882	2.80955e-07	1.31 (1.18, 1.45)
WFDC2	1325	0.731856	0.0575523	4.79633e-37	2.08 (1.86, 2.33)
WNT9A	1351	0.427407	0.0524859	3.84759e-16	1.53 (1.38, 1.7)
XCL1	1395	0.2226	0.0497243	7.58135e-06	1.25 (1.13, 1.38)
XG	1399	0.343141	0.05785	3.00067e-09	1.41 (1.26, 1.58)
YAP1	1153	0.641329	0.0623973	8.84015e-25	1.9 (1.68, 2.15)
ZBTB17	1351	0.247521	0.0486135	3.55033e-07	1.28 (1.16, 1.41)
ZHX2	1153	0.247443	0.0528054	2.78691e-06	1.28 (1.15, 1.42)
P < 0.05/2920. HR: hazard ratio; CI: 95% confidence interval.

## Sheet: Supplementary Data 4
Supplementary Data 4. 172 significant proteins for all-cause mortality.
Variables	N	beta	se	P	HR(CI)
ACTA2	1140	0.481513	0.0646577	9.54063e-14	1.62 (1.43, 1.84)
ACVRL1	1157	0.488055	0.0681836	8.1891e-13	1.63 (1.43, 1.86)
ADAM12	962	0.390915	0.0778524	5.13402e-07	1.48 (1.27, 1.72)
ADM	1180	0.524818	0.0691998	3.34813e-14	1.69 (1.48, 1.94)
AGRN	1167	0.337871	0.0654497	2.43927e-07	1.4 (1.23, 1.59)
ANGPT2	1180	0.496907	0.0674193	1.70117e-13	1.64 (1.44, 1.88)
ANGPTL4	1167	0.364509	0.0659435	3.24647e-08	1.44 (1.27, 1.64)
AREG	1160	0.320543	0.06651	1.43944e-06	1.38 (1.21, 1.57)
ASGR1	1159	0.37579	0.0663342	1.46945e-08	1.46 (1.28, 1.66)
B2M	986	0.419364	0.0720735	5.93588e-09	1.52 (1.32, 1.75)
B4GALT1	1167	0.27456	0.0635906	1.57719e-05	1.32 (1.16, 1.49)
BAMBI	1148	0.275217	0.0632115	1.33728e-05	1.32 (1.16, 1.49)
BTN3A2	1165	0.286154	0.0632503	6.06408e-06	1.33 (1.18, 1.51)
CALCA	1157	0.30688	0.0693333	9.59256e-06	1.36 (1.19, 1.56)
CALCB	979	0.3324	0.0690529	1.4816e-06	1.39 (1.22, 1.6)
CCL14	1170	0.390942	0.0632339	6.31058e-10	1.48 (1.31, 1.67)
CCL15	1188	0.301006	0.0624445	1.43286e-06	1.35 (1.2, 1.53)
CCL23	1167	0.285052	0.0626372	5.34308e-06	1.33 (1.18, 1.5)
CCL3	1165	0.342614	0.0640293	8.75243e-08	1.41 (1.24, 1.6)
CCN3	1186	0.321059	0.0642504	5.82306e-07	1.38 (1.22, 1.56)
CCN4	1180	0.292465	0.0630068	3.45396e-06	1.34 (1.18, 1.52)
CD160	1179	0.280509	0.0618334	5.719e-06	1.32 (1.17, 1.49)
CD27	1176	0.337565	0.0647308	1.83912e-07	1.4 (1.23, 1.59)
CD274	1159	0.2766	0.0624594	9.49019e-06	1.32 (1.17, 1.49)
CD300E	1173	0.418047	0.066018	2.4151e-10	1.52 (1.33, 1.73)
CD300LF	1180	0.343072	0.0639424	8.08004e-08	1.41 (1.24, 1.6)
CD302	1160	0.437387	0.0673129	8.14977e-11	1.55 (1.36, 1.77)
CD38	1160	0.342073	0.0673093	3.73274e-07	1.41 (1.23, 1.61)
CD4	1163	0.2954	0.0648287	5.19847e-06	1.34 (1.18, 1.53)
CD59	1131	0.445343	0.066587	2.26025e-11	1.56 (1.37, 1.78)
CD74	1177	0.456936	0.0651632	2.34632e-12	1.58 (1.39, 1.79)
CD79B	1179	0.38288	0.0657445	5.75401e-09	1.47 (1.29, 1.67)
CD93	1127	0.290203	0.0618286	2.68343e-06	1.34 (1.18, 1.51)
CFD	986	0.338689	0.0735485	4.12505e-06	1.4 (1.21, 1.62)
CHCHD10	979	0.43219	0.0726629	2.7163e-09	1.54 (1.34, 1.78)
CHGB	1174	0.283035	0.0635632	8.47516e-06	1.33 (1.17, 1.5)
CHI3L1	1134	0.34113	0.0658573	2.22083e-07	1.41 (1.24, 1.6)
CHRDL1	1167	0.391152	0.0685706	1.16774e-08	1.48 (1.29, 1.69)
CKAP4	1172	0.334986	0.0645594	2.11645e-07	1.4 (1.23, 1.59)
CLEC14A	1169	0.35219	0.0628606	2.11026e-08	1.42 (1.26, 1.61)
CLEC7A	1179	0.309066	0.0625553	7.78474e-07	1.36 (1.2, 1.54)
CLMP	1180	0.402395	0.0687136	4.73814e-09	1.5 (1.31, 1.71)
COL18A1	1177	0.405901	0.0654389	5.54881e-10	1.5 (1.32, 1.71)
COL6A3	1188	0.455732	0.0669979	1.03049e-11	1.58 (1.38, 1.8)
COLEC12	1164	0.410823	0.0683262	1.82491e-09	1.51 (1.32, 1.72)
CRIM1	1167	0.3918	0.0662526	3.34442e-09	1.48 (1.3, 1.68)
CSF1	1167	0.346977	0.0653809	1.11433e-07	1.41 (1.24, 1.61)
CST3	1174	0.496757	0.0657375	4.13491e-14	1.64 (1.44, 1.87)
CTSB	1175	0.284275	0.0633312	7.16599e-06	1.33 (1.17, 1.5)
CXCL16	1186	0.287355	0.0637374	6.53103e-06	1.33 (1.18, 1.51)
CXCL9	1167	0.328284	0.0644061	3.44895e-07	1.39 (1.22, 1.58)
DEFA1_DEFA1B	1148	0.362289	0.0642638	1.72508e-08	1.44 (1.27, 1.63)
DLL1	1176	0.301951	0.0639634	2.35051e-06	1.35 (1.19, 1.53)
DPT	1188	0.31538	0.0692517	5.26062e-06	1.37 (1.2, 1.57)
DTX3	1160	0.289869	0.0651974	8.74745e-06	1.34 (1.18, 1.52)
EDA2R	1180	0.579099	0.069663	9.34245e-17	1.78 (1.56, 2.05)
EDN1	946	0.401532	0.0738407	5.39368e-08	1.49 (1.29, 1.73)
EFEMP1	1175	0.456445	0.0669812	9.45767e-12	1.58 (1.38, 1.8)
EFNA1	1169	0.409558	0.0654788	3.97949e-10	1.51 (1.32, 1.71)
EFNA4	1157	0.410046	0.0676439	1.3458e-09	1.51 (1.32, 1.72)
ELN	979	0.333041	0.0773463	1.66355e-05	1.4 (1.2, 1.62)
EPHA2	1126	0.297177	0.067136	9.57746e-06	1.35 (1.18, 1.54)
EPHB4	1188	0.307391	0.0636884	1.38962e-06	1.36 (1.2, 1.54)
ESAM	1188	0.28628	0.061626	3.39341e-06	1.33 (1.18, 1.5)
ESM1	1164	0.285507	0.0640474	8.2825e-06	1.33 (1.17, 1.51)
FABP3	979	0.346307	0.0734267	2.40094e-06	1.41 (1.22, 1.63)
FABP4	1188	0.491741	0.0746985	4.61029e-11	1.64 (1.41, 1.89)
FAM3C	1177	0.351283	0.0643369	4.76006e-08	1.42 (1.25, 1.61)
FGF23	1176	0.392357	0.0650142	1.59016e-09	1.48 (1.3, 1.68)
FLRT2	1159	0.309661	0.0625305	7.33943e-07	1.36 (1.21, 1.54)
FSTL3	1162	0.514124	0.0706736	3.47361e-13	1.67 (1.46, 1.92)
GDF15	1188	0.585106	0.070089	6.94015e-17	1.8 (1.56, 2.06)
GGT5	1159	0.302443	0.0651332	3.42641e-06	1.35 (1.19, 1.54)
GIPC2	979	0.303878	0.0691741	1.11825e-05	1.36 (1.18, 1.55)
GPR37	1140	0.324569	0.0640092	3.9644e-07	1.38 (1.22, 1.57)
GUCA2A	1162	0.314512	0.0635502	7.45861e-07	1.37 (1.21, 1.55)
HLA-E	1165	0.345769	0.0629636	3.98381e-08	1.41 (1.25, 1.6)
HRC	946	0.359339	0.0697425	2.57229e-07	1.43 (1.25, 1.64)
HSPB6	1180	0.333885	0.0657805	3.85986e-07	1.4 (1.23, 1.59)
HSPG2	1161	0.399919	0.0662212	1.54941e-09	1.49 (1.31, 1.7)
ICAM5	1178	0.281289	0.0640875	1.13801e-05	1.32 (1.17, 1.5)
IGFBP2	1187	0.331526	0.0686184	1.35547e-06	1.39 (1.22, 1.59)
IGFBP4	1153	0.498585	0.0680978	2.4501e-13	1.65 (1.44, 1.88)
IGFBP7	1188	0.459125	0.0638579	6.48906e-13	1.58 (1.4, 1.79)
IGFBPL1	1178	0.327237	0.0661983	7.68198e-07	1.39 (1.22, 1.58)
IL2RA	1164	0.318323	0.0624091	3.38586e-07	1.37 (1.22, 1.55)
IL6	1160	0.327043	0.06465	4.2217e-07	1.39 (1.22, 1.57)
INHBB	958	0.354957	0.0746006	1.95425e-06	1.43 (1.23, 1.65)
JAM2	1177	0.313737	0.0627128	5.65131e-07	1.37 (1.21, 1.55)
KLK11	1165	0.289599	0.0630677	4.39279e-06	1.34 (1.18, 1.51)
KLK4	1180	0.411983	0.0664081	5.51117e-10	1.51 (1.33, 1.72)
LAG3	1160	0.28351	0.0637731	8.76481e-06	1.33 (1.17, 1.5)
LAIR1	1164	0.363743	0.0670199	5.71842e-08	1.44 (1.26, 1.64)
LAMA4	1167	0.289356	0.0615366	2.57413e-06	1.34 (1.18, 1.51)
LAYN	1157	0.454802	0.0656206	4.18535e-12	1.58 (1.39, 1.79)
LCN2	1127	0.308013	0.064872	2.0543e-06	1.36 (1.2, 1.55)
LGALS9	1162	0.382514	0.0682052	2.04346e-08	1.47 (1.28, 1.68)
LILRB4	1141	0.377532	0.0657138	9.18704e-09	1.46 (1.28, 1.66)
LMNB2	979	0.343034	0.0717367	1.73689e-06	1.41 (1.22, 1.62)
LMOD1	984	0.342019	0.0728014	2.62755e-06	1.41 (1.22, 1.62)
LTBP2	1188	0.478685	0.0686946	3.20796e-12	1.61 (1.41, 1.85)
LTBR	1157	0.313407	0.0638219	9.07733e-07	1.37 (1.21, 1.55)
MAMDC2	979	0.318794	0.0719155	9.29724e-06	1.38 (1.19, 1.58)
MB	1188	0.292405	0.0641727	5.2006e-06	1.34 (1.18, 1.52)
MFAP4	958	0.327275	0.0738533	9.3612e-06	1.39 (1.2, 1.6)
NBL1	1176	0.341475	0.0643728	1.12891e-07	1.41 (1.24, 1.6)
NEFL	1129	0.321989	0.0676918	1.96787e-06	1.38 (1.21, 1.58)
NOTCH3	1188	0.29889	0.0643203	3.36955e-06	1.35 (1.19, 1.53)
NPC2	976	0.439762	0.0729427	1.65113e-09	1.55 (1.35, 1.79)
NPDC1	1178	0.399553	0.0664288	1.80149e-09	1.49 (1.31, 1.7)
NPPB	1140	0.654548	0.0677631	4.48673e-22	1.92 (1.68, 2.2)
NT5C1A	979	0.444072	0.0732499	1.34089e-09	1.56 (1.35, 1.8)
NTproBNP	1178	0.801166	0.0684674	1.25317e-31	2.23 (1.95, 2.55)
OCLN	984	0.393796	0.0722005	4.91924e-08	1.48 (1.29, 1.71)
OGN	1169	0.410422	0.0662188	5.71976e-10	1.51 (1.32, 1.72)
PALM2	979	0.352671	0.0754472	2.94802e-06	1.42 (1.23, 1.65)
PGF	1179	0.388787	0.0665014	5.02645e-09	1.48 (1.29, 1.68)
PGLYRP1	1182	0.362902	0.0638562	1.32261e-08	1.44 (1.27, 1.63)
PIK3IP1	1169	0.349052	0.0652266	8.72873e-08	1.42 (1.25, 1.61)
PLAUR	1157	0.507739	0.0722273	2.06935e-12	1.66 (1.44, 1.91)
PRELP	1164	0.301958	0.0647562	3.11634e-06	1.35 (1.19, 1.54)
PRSS2	1177	0.271384	0.0625784	1.44636e-05	1.31 (1.16, 1.48)
PTGDS	1159	0.354061	0.0645248	4.08358e-08	1.42 (1.26, 1.62)
RBFOX3	984	0.43558	0.0737937	3.57659e-09	1.55 (1.34, 1.79)
REG1A	1164	0.275732	0.0623546	9.77899e-06	1.32 (1.17, 1.49)
REG3A	1188	0.301905	0.0640044	2.39416e-06	1.35 (1.19, 1.53)
RELT	1169	0.411382	0.0637099	1.06723e-10	1.51 (1.33, 1.71)
REN	1178	0.292296	0.0642231	5.33251e-06	1.34 (1.18, 1.52)
RNASE1	988	0.44326	0.072882	1.18778e-09	1.56 (1.35, 1.8)
RNASE10	946	0.324952	0.0700309	3.48195e-06	1.38 (1.21, 1.59)
RNASE4	956	0.36518	0.0736602	7.13559e-07	1.44 (1.25, 1.66)
RNASE6	981	0.429732	0.0722816	2.7604e-09	1.54 (1.33, 1.77)
RNASET2	1182	0.308096	0.0629284	9.78221e-07	1.36 (1.2, 1.54)
RSPO3	1180	0.349891	0.0655815	9.54398e-08	1.42 (1.25, 1.61)
SCARA5	1177	0.279327	0.0637608	1.18213e-05	1.32 (1.17, 1.5)
SCARB2	1128	0.479354	0.0699316	7.15102e-12	1.62 (1.41, 1.85)
SCG2	1172	0.339572	0.0619609	4.24312e-08	1.4 (1.24, 1.59)
SEL1L	946	0.339273	0.0701152	1.30632e-06	1.4 (1.22, 1.61)
SEPTIN8	976	0.343873	0.0704976	1.07274e-06	1.41 (1.23, 1.62)
SHISA5	987	0.423958	0.073212	7.00391e-09	1.53 (1.32, 1.76)
SNCG	1159	0.305893	0.0692116	9.88505e-06	1.36 (1.19, 1.56)
SPINK1	1169	0.382048	0.0652491	4.76367e-09	1.47 (1.29, 1.67)
SPINK4	1165	0.343156	0.064627	1.0975e-07	1.41 (1.24, 1.6)
SPON1	1165	0.368948	0.0652842	1.5914e-08	1.45 (1.27, 1.64)
SPON2	1174	0.377621	0.0655664	8.44267e-09	1.46 (1.28, 1.66)
SPP1	1187	0.343321	0.0637656	7.28033e-08	1.41 (1.24, 1.6)
STC1	1177	0.312132	0.0637312	9.69985e-07	1.37 (1.21, 1.55)
TAFA5	1160	0.314889	0.0658531	1.73833e-06	1.37 (1.2, 1.56)
TFF2	1167	0.33774	0.0661009	3.23069e-07	1.4 (1.23, 1.6)
TFF3	1170	0.498042	0.0641555	8.29143e-15	1.65 (1.45, 1.87)
TIMP1	1157	0.370786	0.0640248	6.98469e-09	1.45 (1.28, 1.64)
TNF	1138	0.31045	0.0635281	1.0248e-06	1.36 (1.2, 1.54)
TNFRSF10A	1159	0.407079	0.0652524	4.4172e-10	1.5 (1.32, 1.71)
TNFRSF10B	1159	0.567307	0.0723265	4.3747e-15	1.76 (1.53, 2.03)
TNFRSF11A	1179	0.300923	0.065491	4.33001e-06	1.35 (1.19, 1.54)
TNFRSF12A	1176	0.405917	0.0653861	5.3662e-10	1.5 (1.32, 1.71)
TNFRSF14	1165	0.290166	0.0645842	7.02839e-06	1.34 (1.18, 1.52)
TNFRSF19	1180	0.382471	0.063116	1.36277e-09	1.47 (1.3, 1.66)
TNFRSF1A	1169	0.40375	0.066238	1.09131e-09	1.5 (1.32, 1.71)
TNFRSF1B	1169	0.318804	0.0649563	9.20215e-07	1.38 (1.21, 1.56)
TNFRSF6B	1159	0.271846	0.0629365	1.56479e-05	1.31 (1.16, 1.48)
TNFRSF9	1159	0.35571	0.0664001	8.45786e-08	1.43 (1.25, 1.63)
TNFSF13	1167	0.309151	0.0634723	1.11233e-06	1.36 (1.2, 1.54)
ULBP2	1159	0.394869	0.0638344	6.17755e-10	1.48 (1.31, 1.68)
UMOD	1180	-0.393343	0.064455	1.0436e-09	0.67 (0.59, 0.77)
VCAM1	1176	0.276534	0.0637856	1.45522e-05	1.32 (1.16, 1.49)
VEGFD	1178	0.301154	0.0629394	1.71142e-06	1.35 (1.19, 1.53)
VSIG2	979	0.386329	0.0701117	3.58435e-08	1.47 (1.28, 1.69)
VSIG4	1167	0.444664	0.0663517	2.06117e-11	1.56 (1.37, 1.78)
WFDC2	1122	0.619689	0.0716487	5.19584e-18	1.86 (1.61, 2.14)
WNT9A	1141	0.391299	0.0677781	7.77602e-09	1.48 (1.29, 1.69)
YAP1	979	0.491652	0.078164	3.17462e-10	1.64 (1.4, 1.91)
P < 0.05/2920. HR: hazard ratio; CI: 95% confidence interval.

## Sheet: Supplementary Data 5
Supplementary Data 5. 13 significant proteins for IS.
Variables	N	beta	se	P	HR(CI)
CST3	1352	0.466146	0.107718	1.50834e-05	1.59 (1.29, 1.97)
GDF15	1366	0.596005	0.117835	4.23733e-07	1.81 (1.44, 2.29)
IGFBP4	1326	0.4829	0.110572	1.25799e-05	1.62 (1.3, 2.01)
NEFL	1295	0.541002	0.110223	9.19024e-07	1.72 (1.38, 2.13)
NPPB	1312	0.511533	0.10577	1.323e-06	1.67 (1.36, 2.05)
NTproBNP	1354	0.6127	0.104412	4.40746e-09	1.85 (1.5, 2.26)
OLR1	1339	0.451682	0.101161	8.00828e-06	1.57 (1.29, 1.92)
PLAUR	1333	0.515609	0.116652	9.86682e-06	1.67 (1.33, 2.1)
RNASET2	1360	0.434919	0.100431	1.48738e-05	1.54 (1.27, 1.88)
SEPTIN8	1120	0.568136	0.126054	6.57227e-06	1.76 (1.38, 2.26)
TIMP1	1335	0.5393	0.104781	2.64825e-07	1.71 (1.4, 2.11)
TNFRSF10B	1329	0.499379	0.11482	1.36616e-05	1.65 (1.32, 2.06)
WFDC2	1290	0.593065	0.118744	5.89884e-07	1.81 (1.43, 2.28)
P < 0.05/2920.IS: ischemic stroke; HR: hazard ratio; CI: 95% confidence interval.

## Sheet: Supplementary Data 6
Supplementary Data 6. 63 proteins showed significant nonlinear relationships for all-cause mortality.
Variables	N	beta	se	P	HR(CI)	Prcs	Pnon-linear	linear trend
AGER	1373	0.100595	0.049715	0.0430287	1.11 (1, 1.22)	4.32227e-09	3.9644e-08	no
AOC3	1394	0.324155	0.051017	2.09971e-10	1.38 (1.25, 1.53)	0	1.17259e-05	yes
BMPER	1132	0.439857	0.0617476	1.05244e-12	1.55 (1.38, 1.75)	0	1.96787e-06	yes
C1QTNF5	1132	0.187409	0.057707	0.00116387	1.21 (1.08, 1.35)	3.2043e-09	2.7696e-06	no
C7	1138	0.528081	0.061436	8.28125e-18	1.7 (1.5, 1.91)	0	1.5175e-05	yes
CALCB	1153	0.324704	0.0573645	1.51045e-08	1.38 (1.24, 1.55)	1.82077e-14	3.21288e-06	yes
CCN3	1403	0.369685	0.0526066	2.10487e-12	1.45 (1.31, 1.6)	0	1.16857e-05	yes
CD160	1395	0.333153	0.0495335	1.74601e-11	1.4 (1.27, 1.54)	0	1.63538e-05	yes
CD22	1395	0.0536786	0.0511826	0.294286	1.06 (0.95, 1.17)	1.36377e-05	5.99872e-06	no
CD27	1388	0.489584	0.0514038	1.66178e-21	1.63 (1.48, 1.8)	0	4.9167e-06	yes
CD72	1132	0.258491	0.0590692	1.20841e-05	1.29 (1.15, 1.45)	6.5146e-11	1.10719e-05	yes
CD79B	1395	0.460677	0.0520056	8.13024e-19	1.59 (1.43, 1.76)	0	1.26814e-07	yes
CDNF	1370	0.317279	0.0502448	2.70756e-10	1.37 (1.24, 1.52)	0	1.99375e-06	yes
CHAD	1132	-0.00280117	0.0572484	0.960975	1 (0.89, 1.12)	1.24569e-05	3.17017e-06	no
CHGB	1389	0.248638	0.051318	1.26581e-06	1.28 (1.16, 1.42)	5.20661e-12	4.13884e-06	yes
COL15A1	1166	0.363783	0.0577854	3.06562e-10	1.44 (1.28, 1.61)	1.11022e-16	5.13873e-06	yes
CRYBB2	1153	0.00247456	0.0559569	0.964727	1 (0.9, 1.12)	1.73162e-06	4.07824e-07	no
DPT	1405	0.309907	0.0562336	3.56685e-08	1.36 (1.22, 1.52)	4.60743e-14	6.96714e-07	yes
ENG	1405	0.175962	0.0501025	0.000444693	1.19 (1.08, 1.32)	3.32515e-08	1.3294e-05	no
EPHB4	1405	0.323712	0.0508575	1.95189e-10	1.38 (1.25, 1.53)	0	5.1714e-08	yes
F13B	1159	-0.0750157	0.0563522	0.183125	0.93 (0.83, 1.04)	9.62172e-06	1.11327e-05	no
FCER2	1384	0.205032	0.0502073	4.43214e-05	1.23 (1.11, 1.35)	9.76837e-10	6.67176e-06	no
FCRL1	1392	0.0469367	0.0501804	0.349603	1.05 (0.95, 1.16)	1.33502e-05	9.35133e-06	no
FOLR1	1385	0.379324	0.0520583	3.18071e-13	1.46 (1.32, 1.62)	0	6.10114e-06	yes
FSTL3	1372	0.605049	0.0553408	8.00227e-28	1.83 (1.64, 2.04)	0	1.31642e-05	yes
GAS6	1396	0.132448	0.0507611	0.00907408	1.14 (1.03, 1.26)	8.70762e-08	4.12964e-06	no
GFRA1	1394	0.409995	0.0521095	3.60491e-15	1.51 (1.36, 1.67)	0	4.17898e-06	yes
HAVCR2	1384	0.397705	0.0522402	2.67817e-14	1.49 (1.34, 1.65)	0	1.15184e-06	yes
IGFBP6	1386	0.30318	0.0531624	1.17779e-08	1.35 (1.22, 1.5)	1.11022e-15	1.58638e-06	yes
IL12B	1395	0.284154	0.0512622	2.97071e-08	1.33 (1.2, 1.47)	1.35225e-13	1.19892e-05	yes
KLK6	1387	0.167801	0.0500302	0.000796525	1.18 (1.07, 1.3)	4.35699e-08	5.93257e-06	no
LMNB2	1153	0.425461	0.0598932	1.21489e-12	1.53 (1.36, 1.72)	0	6.49491e-06	yes
LMOD1	1161	0.448315	0.0597297	6.10861e-14	1.57 (1.39, 1.76)	0	1.22408e-06	yes
MEPE	1375	0.123666	0.0496793	0.0127998	1.13 (1.03, 1.25)	7.79905e-07	1.33607e-05	no
NCR3LG1	1157	0.375787	0.0579317	8.77237e-11	1.46 (1.3, 1.63)	0	1.09093e-05	yes
NECTIN4	1388	0.358615	0.0505044	1.2415e-12	1.43 (1.3, 1.58)	0	6.61733e-07	yes
NPDC1	1392	0.507542	0.0538515	4.30783e-21	1.66 (1.49, 1.85)	0	1.52302e-07	yes
PNLIPRP1	1153	0.150506	0.0554945	0.00668617	1.16 (1.04, 1.3)	2.27157e-07	1.49933e-05	no
PRG2	1166	0.313129	0.0569217	3.77559e-08	1.37 (1.22, 1.53)	3.36287e-13	5.56082e-06	yes
PRRT3	1120	0.151388	0.0567074	0.00759319	1.16 (1.04, 1.3)	1.41272e-09	9.63624e-08	no
PTH	1130	0.195942	0.0567426	0.000554023	1.22 (1.09, 1.36)	6.24311e-11	1.97639e-07	no
RBFOX3	1161	0.561182	0.0598762	7.09131e-21	1.75 (1.56, 1.97)	0	5.3983e-06	yes
RTBDN	1370	0.299185	0.0516142	6.76896e-09	1.35 (1.22, 1.49)	5.66214e-15	9.80545e-06	yes
SCARB2	1333	0.593576	0.0562051	4.52354e-26	1.81 (1.62, 2.02)	0	4.80684e-06	yes
SCGB1A1	1376	0.375211	0.0520262	5.51527e-13	1.46 (1.31, 1.61)	0	6.15725e-06	yes
SCN4B	1120	0.262338	0.0567838	3.83845e-06	1.3 (1.16, 1.45)	2.26091e-11	1.0426e-05	yes
SCRG1	1157	0.375239	0.0582623	1.19079e-10	1.46 (1.3, 1.63)	0	2.69208e-07	yes
SHISA5	1166	0.603929	0.0606115	2.19189e-23	1.83 (1.62, 2.06)	0	0	yes
SLAMF8	1355	0.317081	0.0511548	5.70202e-10	1.37 (1.24, 1.52)	7.77156e-16	1.39365e-05	yes
SLITRK1	1133	0.0117424	0.0606389	0.846455	1.01 (0.9, 1.14)	9.92191e-06	2.71512e-06	no
SLURP1	1161	0.251407	0.0563345	8.09157e-06	1.29 (1.15, 1.44)	7.95142e-13	1.68394e-07	yes
SORCS2	1355	0.500286	0.0532933	6.14967e-21	1.65 (1.49, 1.83)	0	9.72648e-06	yes
SPON2	1388	0.505753	0.0535873	3.80245e-21	1.66 (1.49, 1.84)	0	4.51358e-06	yes
TAFA5	1370	0.37279	0.0522106	9.32563e-13	1.45 (1.31, 1.61)	0	5.03955e-08	yes
TFF2	1378	0.397239	0.0534981	1.12527e-13	1.49 (1.34, 1.65)	0	1.63356e-05	yes
TGOLN2	1164	0.261467	0.05556	2.52584e-06	1.3 (1.16, 1.45)	8.94285e-13	2.90388e-06	yes
THBD	1392	0.206263	0.0505909	4.56042e-05	1.23 (1.11, 1.36)	3.95906e-13	2.07588e-08	no
TMPRSS11D	1150	0.17896	0.0573456	0.00180406	1.2 (1.07, 1.34)	1.57039e-08	6.47797e-06	no
TNFRSF13C	1351	0.116204	0.0492524	0.0183061	1.12 (1.02, 1.24)	1.11013e-06	1.20805e-05	no
TNFRSF19	1395	0.41605	0.0512866	4.96858e-16	1.52 (1.37, 1.68)	0	6.53809e-06	yes
VGF	1161	0.0573908	0.0545116	0.292424	1.06 (0.95, 1.18)	1.23921e-07	1.66996e-07	no
VIT	1157	0.23773	0.057318	3.36027e-05	1.27 (1.13, 1.42)	5.58256e-11	6.1241e-06	no
XG	1399	0.343141	0.05785	3.00067e-09	1.41 (1.26, 1.58)	5.32907e-15	1.57423e-05	yes
P < 0.05/2920. HR: hazard ratio; CI: 95% confidence interval.

## Sheet: Supplementary Data 7
Supplementary Data 7. 22 proteins showed significant nonlinear relationships for HF mortality.
Variables	N	beta	se	P	HR(CI)	Prcs	Pnon-linear	linear trend
ADAM12	962	0.390915	0.0778524	5.13402e-07	1.48 (1.27, 1.72)	4.05231e-14	2.73336e-07	yes
AMBP	1180	0.235268	0.0644661	0.000262764	1.27 (1.12, 1.44)	3.99337e-09	1.56058e-05	no
CGREF1	1178	0.178124	0.0632408	0.00485354	1.19 (1.06, 1.35)	2.32137e-07	1.49999e-05	no
CST6	1142	0.101036	0.0637745	0.113132	1.11 (0.98, 1.25)	3.2351e-06	1.34197e-05	no
EFNA4	1157	0.410046	0.0676439	1.3458e-09	1.51 (1.32, 1.72)	1.11022e-16	1.1011e-05	yes
EPHB4	1188	0.307391	0.0636884	1.38962e-06	1.36 (1.2, 1.54)	1.11022e-16	3.55476e-08	yes
FOLR1	1173	0.252315	0.06533	0.000112388	1.29 (1.13, 1.46)	3.09537e-11	3.7953e-06	no
GGT5	1159	0.302443	0.0651332	3.42641e-06	1.35 (1.19, 1.54)	3.24716e-11	1.31775e-06	yes
KLK11	1165	0.289599	0.0630677	4.39279e-06	1.34 (1.18, 1.51)	2.24143e-12	4.45205e-06	yes
KLK6	1175	0.103057	0.0636466	0.105404	1.11 (0.98, 1.26)	4.75496e-07	7.75763e-07	no
LRP11	1178	0.231791	0.0641636	0.000303267	1.26 (1.11, 1.43)	2.40682e-09	1.12512e-05	no
MFAP4	958	0.327275	0.0738533	9.3612e-06	1.39 (1.2, 1.6)	8.86269e-12	1.38629e-05	yes
MOG	1180	0.182856	0.0641951	0.00439344	1.2 (1.06, 1.36)	4.35379e-08	1.18192e-05	no
NCS1	1180	0.0775376	0.0636249	0.222971	1.08 (0.95, 1.22)	5.72159e-06	6.36597e-06	no
NTproBNP	1178	0.801166	0.0684674	1.25317e-31	2.23 (1.95, 2.55)	0	1.16633e-05	yes
PRSS2	1177	0.271384	0.0625784	1.44636e-05	1.31 (1.16, 1.48)	6.87971e-11	9.20701e-06	yes
REN	1178	0.292296	0.0642231	5.33251e-06	1.34 (1.18, 1.52)	1.23301e-12	2.79389e-07	yes
ROR1	1178	0.160563	0.0625427	0.0102507	1.17 (1.04, 1.33)	1.50421e-07	1.6949e-05	no
SCARB2	1128	0.479354	0.0699316	7.15102e-12	1.62 (1.41, 1.85)	0	1.46215e-07	yes
SEMA3G	958	0.192119	0.0704768	0.00641101	1.21 (1.06, 1.39)	1.39626e-08	3.44461e-06	no
SPON2	1174	0.377621	0.0655664	8.44267e-09	1.46 (1.28, 1.66)	1.11022e-15	4.64762e-06	yes
THBD	1178	0.0629074	0.0637366	0.323647	1.06 (0.94, 1.21)	6.54419e-10	4.93353e-10	no
P < 0.05/2920. HF: heart failure; HR: hazard ratio; CI: 95% confidence interval.
