# Supplementary material for: Proteomic signatures and machine learning based-prediction models for cardiovascular risk in survivors of myocardial infarction
Source: Research Square preprint supplement (doi:10.21203/rs.3.rs-8004311/v1), 2025-12-01
Supplement: Supplementary file 2 [file c703c71a26f0261b6f89b404.docx]

**Supplementary Material**

**
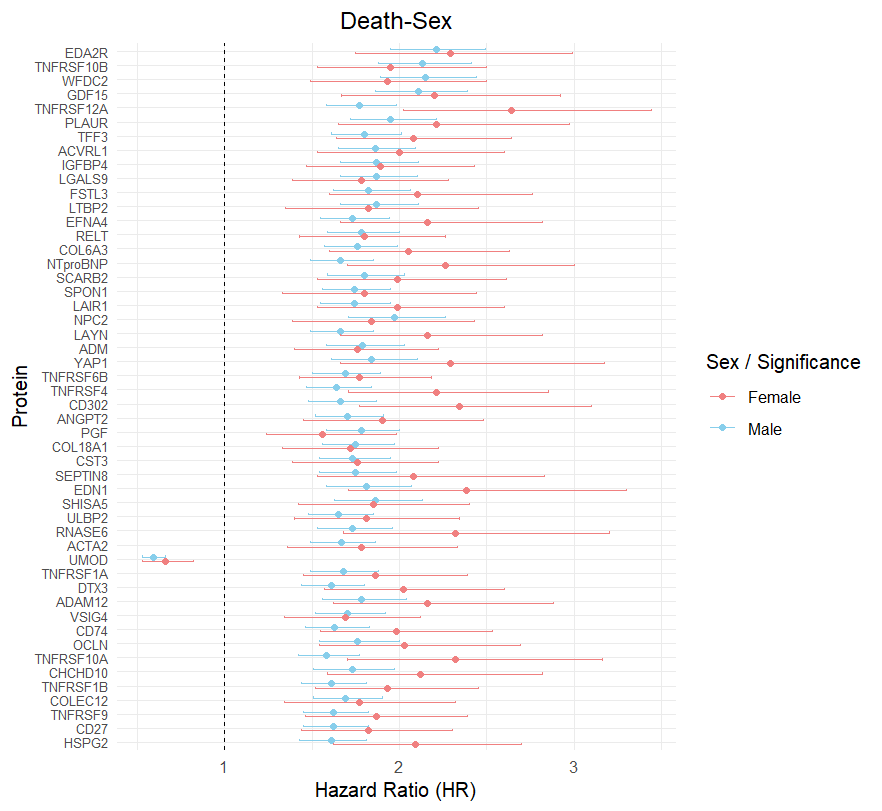
**

**Supplementary Figure 1.** **Forest plot of sex subgroup analysis in all-cause mortality outcome group: top 50 significant proteins from main analysis.**


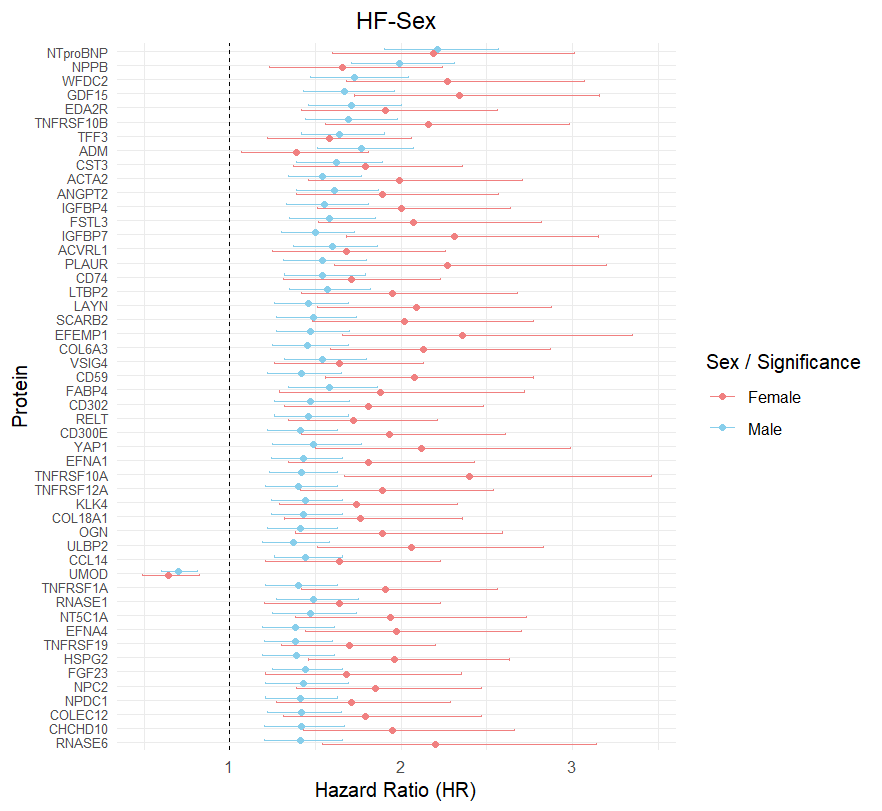


**Supplementary Figure 2. Forest plot of sex subgroup analysis in HF outcome group: top 50 significant proteins from main analysis.**
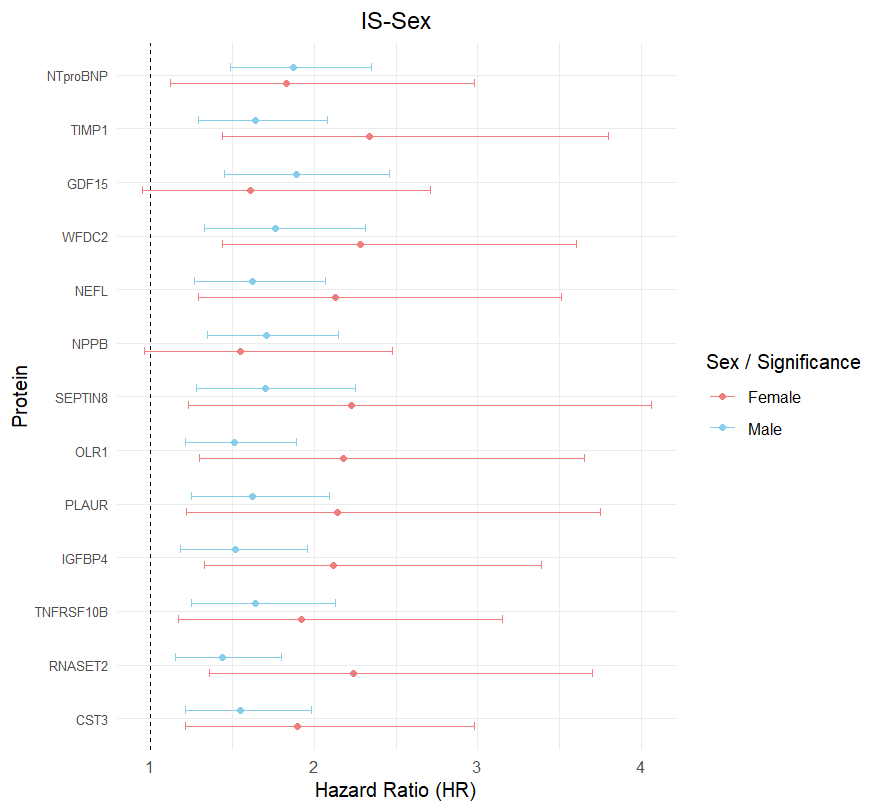


**Supplementary Figure 3. Forest plot of sex subgroup analysis in IS outcome group: top 50 significant proteins from main analysis.**


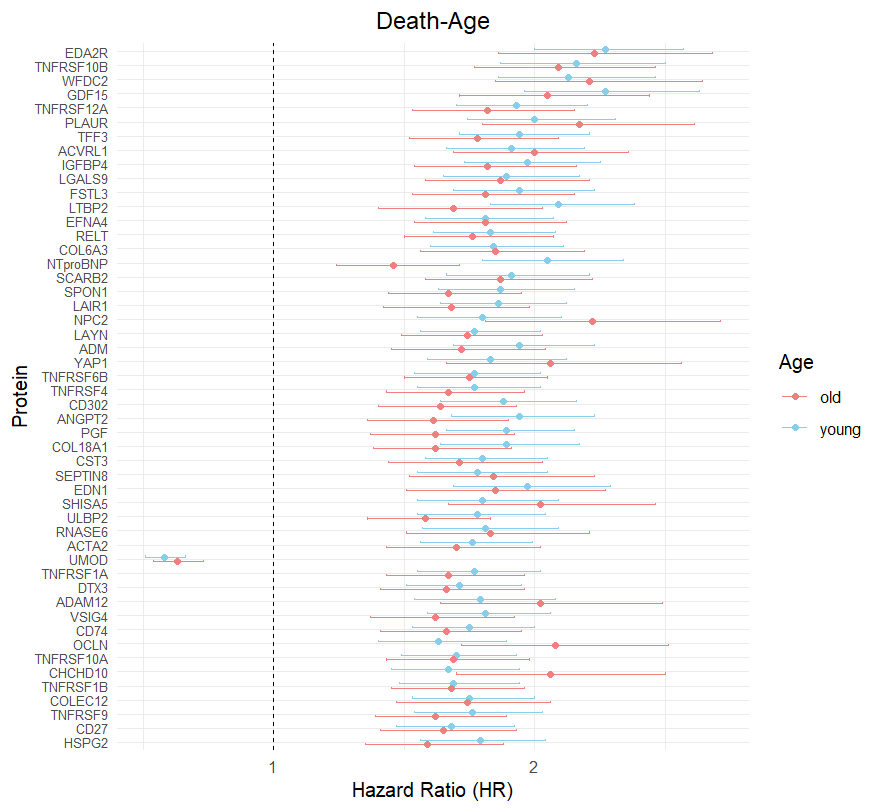


**Supplementary Figure 4. Forest plot of age subgroup analysis in all-cause mortality outcome group: top 50 significant proteins from main analysis.**


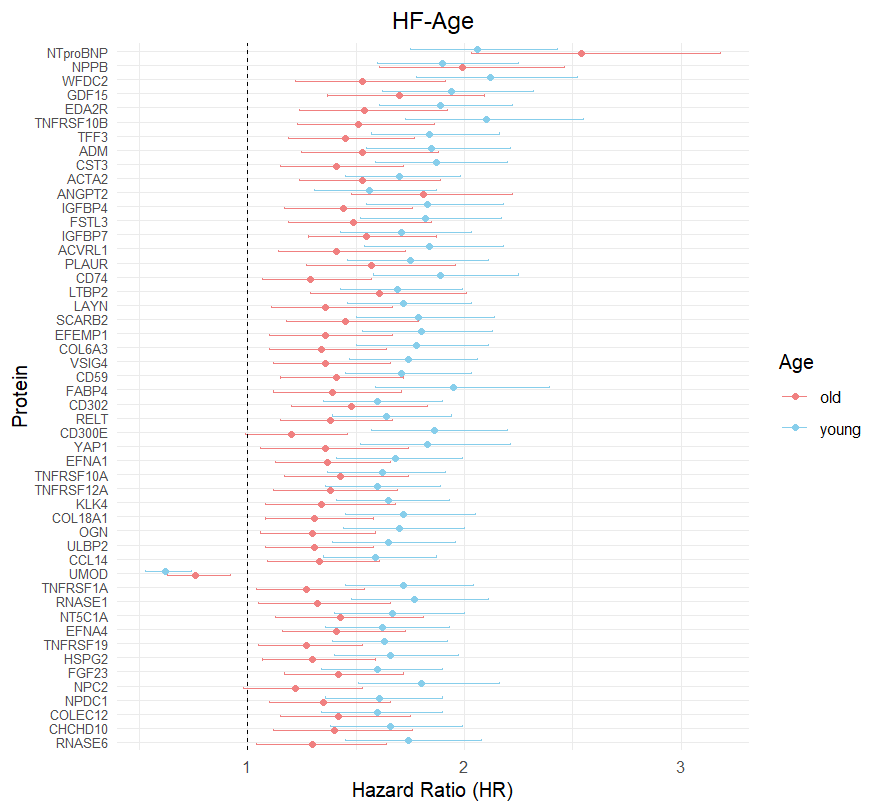


**Supplementary Figure 5. Forest plot of age subgroup analysis in HF outcome group: top 50 significant proteins from main analysis.**


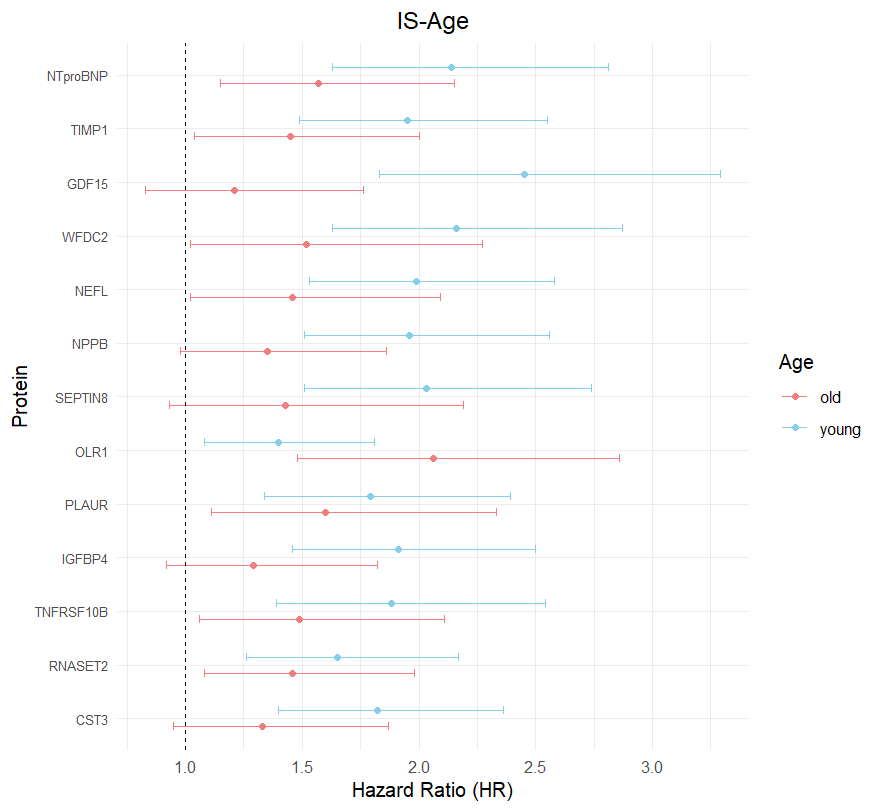


**Supplementary Figure 6. Forest plot of age subgroup analysis in IS outcome group: top 50 significant proteins from main analysis.**


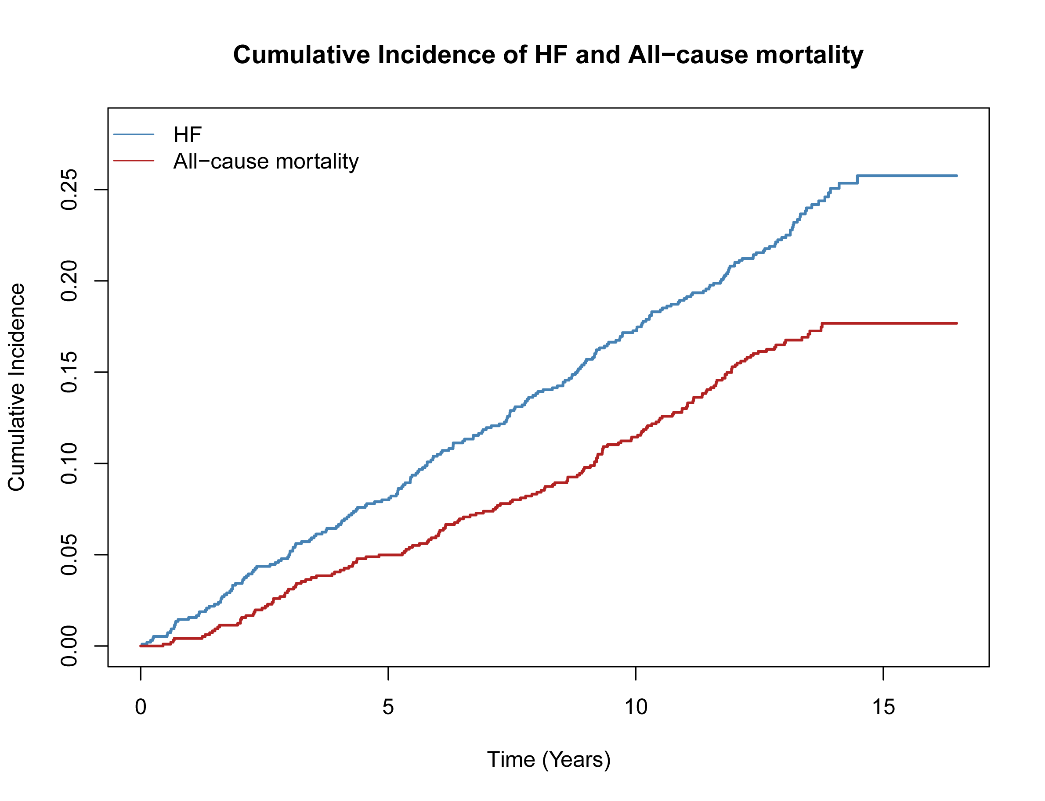


**Supplementary Figure 7.** **Cumulative incidence curves of HF and death over time.**

**
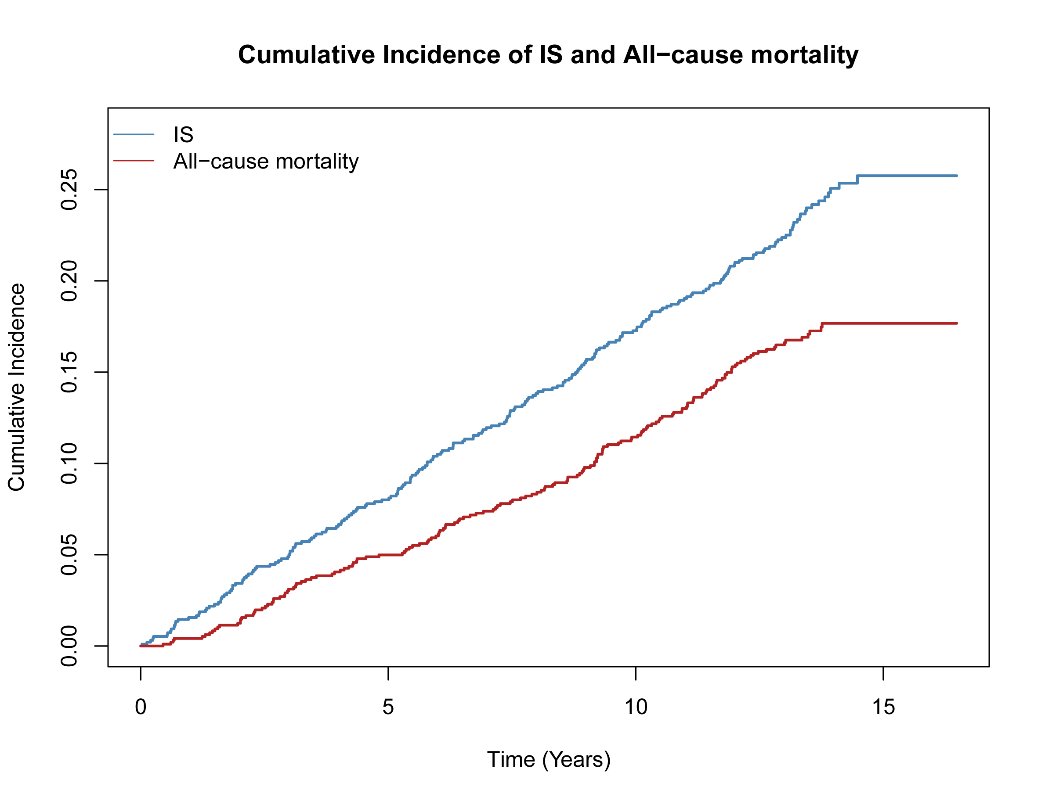
**

**Supplementary Figure 8.** **Cumulative incidence curves of IS and death over time.**

**
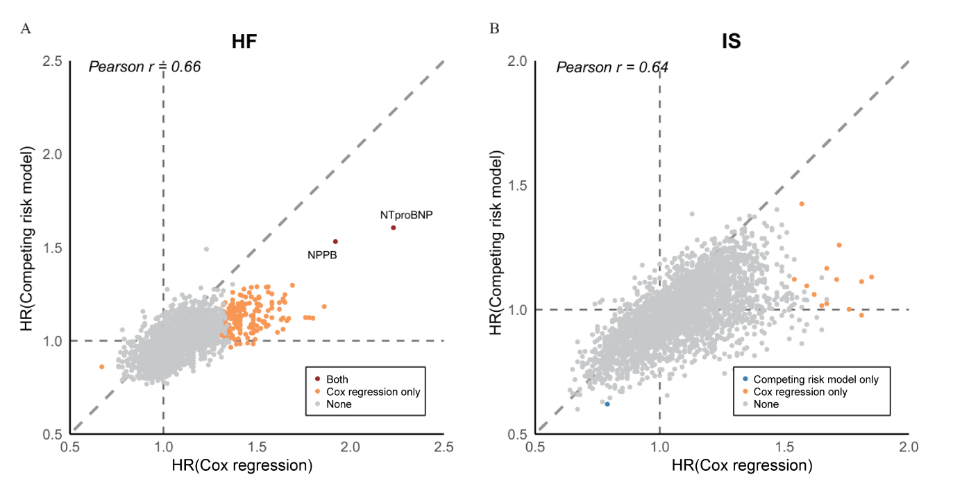
**

**Supplementary Figure 9.** **Comparison of HRs across different models.**


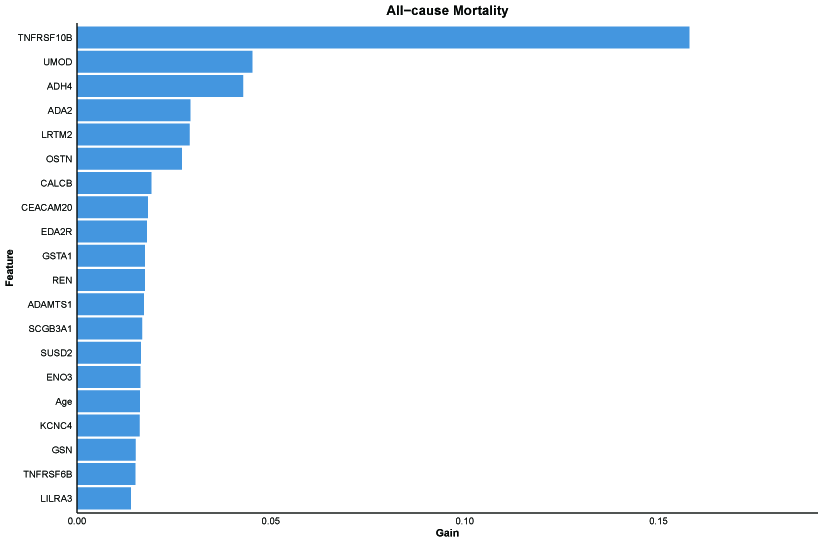


**Supplementary Figure 10.** **Top 20 features importance of XGBoost for all-cause mortality outcome prediction.**

**
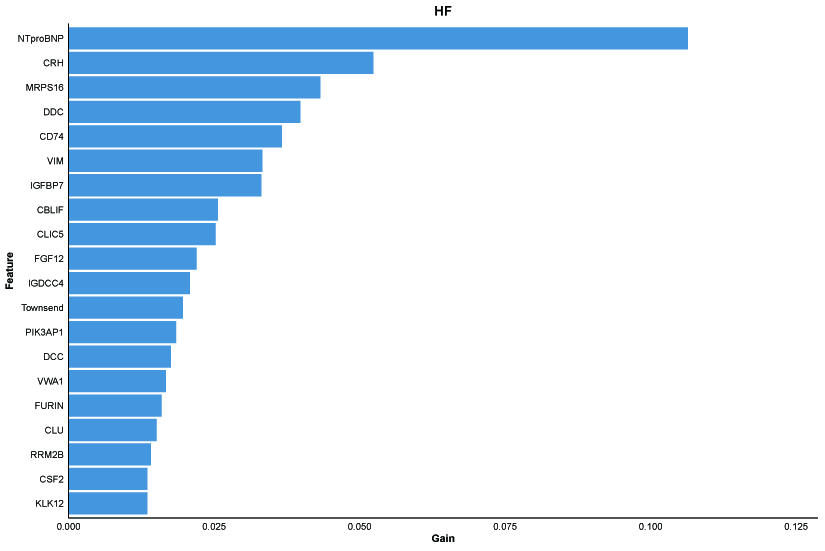
**

**Supplementary Figure 11.** **Top 20 features importance of LightGBM for HF outcome prediction.**

**
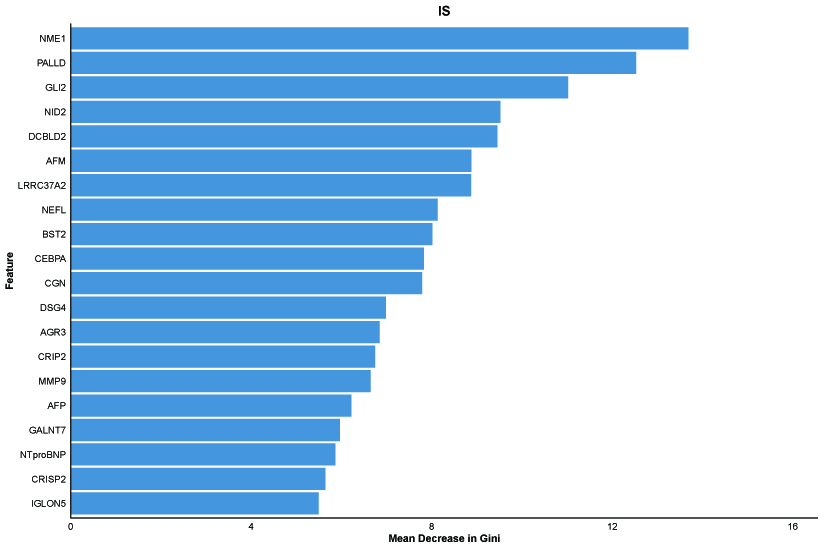
**

**Supplementary Figure 12.** **Top 20 features importance of Random Forest for IS outcome prediction**
